# Supplementary material for: Multi-Omics Characterization of Host-Derived Bacillus spp. Probiotics for Improved Growth Performance in Poultry
Source: Frontiers journal article supplement (doi:10.3389/fmicb.2021.747845), 2021-10-20
Supplement: Table_1.XLSX [file Table_1.XLSX]

## Sheet: Table S1
Table S1. In-vitro pathogen inhibition and digestive enzyme activities of eight Bacillus spp.
Pathogen inhibition and digestive enzyme activities	Ba-006	Ba-PTA84	Ba-PTA85	Ba-071	Bs-082	Bs-PTA86	Ba-151	Ba-175
Pathogen inhibitiona
Salmonella Typhimurium ATCC 14028	1	1	2	1	1	0	1	2
Clostridium perfringens JP1011	4	4	4	4	4	3	3	4
APEC O78	1	0	1	1	0	0	1	2
APEC O2	1	1	1	1	0	1	1	1
APEC O18	1	1	2	1	1	1	1	2
Cumulative pathogen inhibition Score	8	7	10	8	6	5	7	11
Digestive enzymesb
Amylase	1.83	1.8	2.1	1.59	1.79	2.04	1.74	1.91
Protease	2.05	2.58	2.05	2	1.95	1.95	2.05	1.9
Beta-mannanase	2.2	1.49	1.95	1.14	1.69	2	2.18	2.1
Cumulative REA Score	6.08	5.87	6.1	4.73	5.43	5.99	5.97	5.91
a Pathogen inhibiton scores were assigned based on the size of clearance zone as follows, 0, no inhibition; 1, 2, 3, 4, clearance zone values of 0 - 0.9, 1.0 - 1.9, 2.0-2.9, and 3.0 - 4.0 mm, respectively. A clearance zone value is defined as the distance from the outer part of Bacillus colony to the end of pathogen growth inhibition zone as depicted in Fig. 1A. b Relative digestive enzyme activi…

## Sheet: Table S2
Table S2. A heat map of metabolites identified in culture supernatant of Bacillus individual strains or strain consortia grown in rich media
Numbes indicate the fold-increase in metabolite intensities compared to media control
Super Pathway	Pathway	Metabolite	Ba PTA84	Ba PTA85	Bs PTA86	Ba PTA84+Ba PTA85	Ba PTA84+Ba PTA85+Bs PTA86
Amino Acid	Alanine and Aspartate Metabolism	N-acetylalanine	5.1148	5.39353	6.63451	5.43494	3.81472
Amino Acid	Alanine and Aspartate Metabolism	N-acetylaspartate (NAA)	2.14737	<1.5	1.7055	2.59677	1.67147
Amino Acid	Alanine and Aspartate Metabolism	N,N-dimethylalanine	<1.5	<1.5	<1.5	<1.5	2.00931
Amino Acid	Glutamate Metabolism	glutamine	30.8257	30.3787	10.3893	28.6083	23.6948
Amino Acid	Glutamate Metabolism	N-acetylglutamate	<1.5	<1.5	1.69446	<1.5	<1.5
Amino Acid	Glutamate Metabolism	N-acetylglutamine	<1.5	<1.5	3.28552	<1.5	<1.5
Amino Acid	Glutathione Metabolism	glutathione, reduced (GSH)	18.36	19.6148	25.1551	23.9014	18.7189
Amino Acid	Glutathione Metabolism	cysteine-glutathione disulfide	5.07343	4.67986	2.50315	4.90683	3.11818
Amino Acid	Glutathione Metabolism	2-hydroxybutyrate/2-hydroxyisobutyrate	4.21861	4.15822	9.1374	4.13815	4.87601
Amino Acid	Glutathione Metabolism	glutathione, oxidized (GSSG)	<1.5	<1.5	2.12325	<1.5	1.77567
Amino Acid	Glycine, Serine and Threonine Metabolism	N-acetylserine	2.94686	3.01496	6.56149	2.96015	2.69764
Amino Acid	Glycine, Serine and Threonine Metabolism	N-acetylthreonine	15.6424	17.4745	30.6431	17.6601	11.5486
Amino Acid	Glycine, Serine and Threonine Metabolism	allo-threonine	<1.5	<1.5	1.52888	<1.5	<1.5
Amino Acid	Histidine Metabolism	N-acetylhistidine	1.54136	1.5835	3.92825	1.59523	<1.5
Amino Acid	Histidine Metabolism	trans-urocanate	<1.5	<1.5	3.18706	<1.5	<1.5
Amino Acid	Leucine, Isoleucine and Valine Metabolism	1-carboxyethylleucine	87.1228	75.0005	81.8361	76.5278	73.4675
Amino Acid	Leucine, Isoleucine and Valine Metabolism	alpha-hydroxyisocaproate	2.98873	2.37558	2.51312	2.40854	2.29422
Amino Acid	Leucine, Isoleucine and Valine Metabolism	3-methylglutaconate	2.57864	1.96278	1.99758	2.32995	2.0917
Amino Acid	Leucine, Isoleucine and Valine Metabolism	N-acetylisoleucine	1.51253	<1.5	9.85579	<1.5	<1.5
Amino Acid	Leucine, Isoleucine and Valine Metabolism	1-carboxyethylisoleucine	70.4869	62.6888	91.3012	77.2871	63.8904
Amino Acid	Leucine, Isoleucine and Valine Metabolism	methylsuccinate	1.64146	1.63908	1.66483	1.51045	1.53339
Amino Acid	Leucine, Isoleucine and Valine Metabolism	1-carboxyethylvaline	91.8871	82.785	131.848	84.2871	72.5546
Amino Acid	Leucine, Isoleucine and Valine Metabolism	isovalerate (C5)	<1.5	<1.5	2.36201	<1.5	<1.5
Amino Acid	Leucine, Isoleucine and Valine Metabolism	N-acetylvaline	<1.5	<1.5	3.22005	<1.5	<1.5
Amino Acid	Lysine Metabolism	N2-acetyllysine	2.8617	1.60706	4.26517	2.31802	1.53866
Amino Acid	Lysine Metabolism	N6,N6-dimethyllysine	3.30587	<1.5	3.88488	6.33698	4.87987
Amino Acid	Lysine Metabolism	fructosyllysine	1.55759	<1.5	2.25768	1.58423	1.62854
Amino Acid	Lysine Metabolism	N6-acetyllysine	<1.5	<1.5	1.63695	<1.5	<1.5
Amino Acid	Lysine Metabolism	N-acetyl-cadaverine	<1.5	<1.5	3.77204	<1.5	<1.5
Amino Acid	Methionine, Cysteine, SAM and Taurine Metabolism	N-formylmethionine	2.07358	2.00644	2.99892	2.2093	1.95655
Amino Acid	Methionine, Cysteine, SAM and Taurine Metabolism	S-adenosylmethionine (SAM)	3.90005	4.2971	6.86544	4.24805	2.69578
Amino Acid	Methionine, Cysteine, SAM and Taurine Metabolism	2-hydroxy-4-(methylthio)butanoic acid	2.35135	1.76002	4.02882	1.79601	1.9322
Amino Acid	Methionine, Cysteine, SAM and Taurine Metabolism	homocysteine	4.75182	4.4893	<1.5	5.04943	4.57386
Amino Acid	Methionine, Cysteine, SAM and Taurine Metabolism	cysteine	13.8971	12.8622	15.5553	14.8022	11.9478
Amino Acid	Methionine, Cysteine, SAM and Taurine Metabolism	S-methylcysteine	1.98386	2.12333	6.04879	3.51405	4.55259
Amino Acid	Methionine, Cysteine, SAM and Taurine Metabolism	N-acetylmethionine	<1.5	<1.5	2.31734	<1.5	<1.5
Amino Acid	Methionine, Cysteine, SAM and Taurine Metabolism	N-acetylcysteine	<1.5	<1.5	1.90912	<1.5	<1.5
Amino Acid	Methionine, Cysteine, SAM and Taurine Metabolism	3-sulfo-L-alanine	<1.5	<1.5	1.63561	<1.5	<1.5
Amino Acid	Phenylalanine Metabolism	1-carboxyethylphenylalanine	174.722	145.506	148.498	151.899	133.932
Amino Acid	Phenylalanine Metabolism	phenyllactate (PLA)	8.00693	5.51503	19.4356	6.3756	5.25728
Amino Acid	Phenylalanine Metabolism	phenylacetate	1.86099	1.79167	1.88648	<1.5	<1.5
Amino Acid	Phenylalanine Metabolism	N-acetylphenylalanine	<1.5	<1.5	2.39733	<1.5	<1.5
Amino Acid	Polyamine Metabolism	agmatine	4.54554	4.7691	4.37457	4.33121	4.44604
Amino Acid	Polyamine Metabolism	N(1)-acetylspermine	1.86201	1.91137	<1.5	2.08503	2.31722
Amino Acid	Polyamine Metabolism	N1,N12-diacetylspermine	3.09283	3.62255	3.36985	4.3984	3.62865
Amino Acid	Polyamine Metabolism	acetylagmatine	<1.5	<1.5	2.20857	<1.5	<1.5
Amino Acid	Tryptophan Metabolism	indolelactate	10.4291	7.81685	15.5355	9.02508	7.57846
Amino Acid	Tryptophan Metabolism	indole-3-carboxylate	5.54585	7.04107	1.72543	6.25168	7.24037
Amino Acid	Tyrosine Metabolism	1-carboxyethyltyrosine	11.0448	10.0257	11.6627	9.69888	6.30674
Amino Acid	Tyrosine Metabolism	4-hydroxyphenylpyruvate	1.72265	1.73383	<1.5	<1.5	1.56191
Amino Acid	Tyrosine Metabolism	3-(4-hydroxyphenyl)lactate (HPLA)	5.37625	4.72476	19.6172	5.2378	4.18389
Amino Acid	Urea cycle; Arginine and Proline Metabolism	N-acetylarginine	1.53673	1.50404	2.64756	1.5348	<1.5
Amino Acid	Urea cycle; Arginine and Proline Metabolism	N-acetylcitrulline	10.9871	<1.5	<1.5	<1.5	4.95249
Amino Acid	Urea cycle; Arginine and Proline Metabolism	N-delta-acetylornithine	13.9029	13.0313	13.5986	13.5098	13.268
Carbohydrate	Aminosugar Metabolism	N-acetyl-glucosamine 1-phosphate	1.75901	2.03551	1.75137	1.95638	2.25089
Carbohydrate	Aminosugar Metabolism	N-acetylmuramate	1.73191	<1.5	2.4275	<1.5	<1.5
Carbohydrate	Aminosugar Metabolism	erythronate*	1.55254	1.5166	<1.5	<1.5	<1.5
Carbohydrate	Aminosugar Metabolism	glucuronate	<1.5	<1.5	5.3185	<1.5	<1.5
Carbohydrate	Fructose, Mannose and Galactose Metabolism	fructose	5.27979	4.06684	<1.5	4.26932	6.00984
Carbohydrate	Fructose, Mannose and Galactose Metabolism	mannitol/sorbitol	1.67885	1.93662	2.25076	1.82372	1.63024
Carbohydrate	Fructose, Mannose and Galactose Metabolism	galactonate	1.64607	<1.5	1.60207	<1.5	1.63061
Carbohydrate	Glycolysis, Gluconeogenesis, and Pyruvate Metabolism	glucose	7.07005	7.37836	6.45192	7.13998	9.00169
Carbohydrate	Glycolysis, Gluconeogenesis, and Pyruvate Metabolism	glucose 6-phosphate	2.11939	2.11022	2.47967	2.37573	2.26363
Carbohydrate	Glycolysis, Gluconeogenesis, and Pyruvate Metabolism	dihydroxyacetone phosphate (DHAP)	12.125	11.2172	15.4741	9.40284	8.37619
Carbohydrate	Glycolysis, Gluconeogenesis, and Pyruvate Metabolism	3-phosphoglycerate	23.2399	28.9415	19.6625	27.4722	22.365
Carbohydrate	Glycolysis, Gluconeogenesis, and Pyruvate Metabolism	phosphoenolpyruvate (PEP)	29.2634	34.6053	6.3176	31.2924	23.306
Carbohydrate	Glycolysis, Gluconeogenesis, and Pyruvate Metabolism	lactate	40.5055	38.4748	28.7954	37.9205	38.9738
Carbohydrate	Glycolysis, Gluconeogenesis, and Pyruvate Metabolism	Isobar: hexose diphosphates	<1.5	<1.5	<1.5	1.98616	2.44348
Carbohydrate	Pentose Metabolism	ribose	5.41439	4.14034	<1.5	5.31191	3.9383
Carbohydrate	Pentose Metabolism	ribulose/xylulose	10.8702	11.5801	7.61854	11.1238	7.75636
Carbohydrate	Pentose Metabolism	arabitol/xylitol	2.22119	2.1787	1.51663	1.99275	1.82552
Carbohydrate	Pentose Metabolism	sedoheptulose	9.59345	10.2953	6.4915	11.0918	8.14575
Carbohydrate	Pentose Metabolism	ribulonate/xylulonate/lyxonate*	2.39485	1.69869	2.00579	1.6695	2.58946
Carbohydrate	Pentose Phosphate Pathway	sedoheptulose-7-phosphate	1.82087	1.78507	<1.5	1.83749	2.40677
Cofactors and Vitamins	Ascorbate and Aldarate Metabolism	glucarate (saccharate)	<1.5	1.50306	1.63486	<1.5	2.14818
Cofactors and Vitamins	Nicotinate and Nicotinamide Metabolism	nicotinate ribonucleoside	65.1476	66.9293	8.25491	87.7048	50.4936
Cofactors and Vitamins	Nicotinate and Nicotinamide Metabolism	nicotinamide ribonucleotide (NMN)	39.5835	23.2192	20.5159	31.3391	24.6843
Cofactors and Vitamins	Nicotinate and Nicotinamide Metabolism	nicotinamide riboside	2.04913	1.53525	3.13042	1.90539	1.70475
Cofactors and Vitamins	Nicotinate and Nicotinamide Metabolism	NAD+	<1.5	2.94519	6.96701	2.01861	1.63859
Cofactors and Vitamins	Pterin Metabolism	pterin	<1.5	<1.5	1.9349	<1.5	1.68376
Cofactors and Vitamins	Thiamine Metabolism	hydroxymethylpyrimidine	2.25447	2.1671	<1.5	1.9724	2.18779
Cofactors and Vitamins	Vitamin B6 Metabolism	pyridoxamine	<1.5	<1.5	1.96805	<1.5	<1.5
Cofactors and Vitamins	Vitamin B6 Metabolism	pyridoxamine phosphate	<1.5	<1.5	2.681	<1.5	<1.5
Energy	TCA Cycle	aconitate [cis or trans]	2.41751	2.37754	4.28506	2.83884	3.68826
Energy	TCA Cycle	isocitric lactone	1.63289	<1.5	1.56384	1.61615	1.62869
Energy	TCA Cycle	alpha-ketoglutarate	10.3294	6.87777	<1.5	8.74618	7.16399
Energy	TCA Cycle	succinate	19.4263	4.90201	3.80116	19.5473	8.74775
Energy	TCA Cycle	2-methylcitrate	1.87696	1.72689	3.75073	2.88755	6.47257
Energy	TCA Cycle	tricarballylate	<1.5	<1.5	1.58297	<1.5	1.65309
Lipid	Fatty Acid Metabolism (also BCAA Metabolism)	methylmalonate (MMA)	<1.5	1.57582	<1.5	<1.5	1.50322
Lipid	Fatty Acid, Dicarboxylate	glutarate (C5-DC)	1.64675	<1.5	<1.5	<1.5	<1.5
Lipid	Fatty Acid, Dicarboxylate	2-hydroxyadipate	2.2224	1.85361	2.04912	2.2983	2.00878
Lipid	Fatty Acid, Dihydroxy	2R,3R-dihydroxybutyrate	<1.5	<1.5	3.97444	<1.5	<1.5
Lipid	Fatty Acid, Monohydroxy	5-hydroxyhexanoate	7.15149	4.76451	<1.5	4.74531	6.08515
Lipid	Glycerolipid Metabolism	glycerol 3-phosphate	3.4433	2.77111	1.56065	2.92661	2.32361
Lipid	Inositol Metabolism	inositol 1-phosphate (I1P)	1.73957	<1.5	<1.5	1.76424	<1.5
Lipid	Mevalonate Metabolism	3-hydroxy-3-methylglutarate	3.52744	3.2434	3.61176	3.19091	3.33783
Lipid	Monoacylglycerol	1-linoleoylglycerol (18:2)	<1.5	2.20614	<1.5	<1.5	<1.5
Lipid	Phospholipid Metabolism	phosphocholine	2.83234	2.67657	1.86888	2.58541	2.51634
Lipid	Phospholipid Metabolism	glycerophosphoethanolamine	2.10034	2.04728	2.14545	1.99766	2.11415
Lipid	Phospholipid Metabolism	glycerophosphorylcholine (GPC)	<1.5	<1.5	1.56987	<1.5	<1.5
Nucleotide	Dinucleotide	(3'-5')-adenylylcytidine	1.59481	1.83472	<1.5	1.914	2.1478
Nucleotide	Dinucleotide	(3'-5')-adenylyluridine	3.16535	3.28902	<1.5	4.13683	4.28087
Nucleotide	Dinucleotide	(3'-5')-adenylyladenosine*	1.53455	1.59949	<1.5	1.61069	1.60454
Nucleotide	Dinucleotide	(3'-5')-cytidylyladenosine	1.83614	1.9014	<1.5	1.97378	2.07401
Nucleotide	Dinucleotide	(3'-5')-cytidylylcytidine*	2.16875	2.39074	<1.5	2.70649	2.92151
Nucleotide	Dinucleotide	(3'-5')-cytidylyluridine*	5.75355	5.8186	<1.5	7.60779	6.73985
Nucleotide	Dinucleotide	(3'-5')-uridylylcytidine*	1.6127	1.52305	<1.5	1.54604	1.55258
Nucleotide	Dinucleotide	(3'-5')-uridylyluridine	2.29842	2.16983	<1.5	2.91334	2.94516
Nucleotide	Dinucleotide	(3'-5')-uridylyladenosine	1.54924	1.5095	<1.5	1.51932	1.53028
Nucleotide	Dinucleotide	(3'-5')-adenylylguanosine*	<1.5	<1.5	<1.5	<1.5	1.7593
Nucleotide	Purine Metabolism, (Hypo)Xanthine/Inosine containing	hypoxanthine	5.49743	3.98662	<1.5	4.19761	5.91231
Nucleotide	Purine Metabolism, (Hypo)Xanthine/Inosine containing	5-aminoimidazole-4-carboxamide	<1.5	<1.5	2.62728	<1.5	<1.5
Nucleotide	Purine Metabolism, Adenine containing	N6-methyladenosine	1.69075	<1.5	<1.5	1.52017	1.73843
Nucleotide	Purine Metabolism, Adenine containing	2'-O-methyladenosine	2.66118	<1.5	<1.5	1.65502	1.87392
Nucleotide	Purine Metabolism, Adenine containing	N6-succinyladenosine	29.8214	30.0389	29.3181	31.8791	31.9246
Nucleotide	Purine Metabolism, Adenine containing	1-methyladenine	<1.5	<1.5	1.71624	<1.5	<1.5
Nucleotide	Purine Metabolism, Guanine containing	guanine	9.41387	4.4118	<1.5	6.07573	6.5469
Nucleotide	Purine Metabolism, Guanine containing	guanosine 3'-monophosphate (3'-GMP)	<1.5	1.77066	<1.5	1.53273	1.90877
Nucleotide	Purine Metabolism, Guanine containing	guanosine-2',3'-cyclic monophosphate	<1.5	2.711	<1.5	2.1761	2.27949
Nucleotide	Pyrimidine Metabolism, Cytidine containing	CMP	<1.5	1.54961	2.25696	<1.5	<1.5
Nucleotide	Pyrimidine Metabolism, Cytidine containing	cytidine 2',3'-cyclic monophosphate	<1.5	1.8429	<1.5	1.85938	2.37183
Nucleotide	Pyrimidine Metabolism, Orotate containing	N-carbamoylaspartate	10.9065	11.4821	27.2958	11.8771	8.78733
Nucleotide	Pyrimidine Metabolism, Orotate containing	dihydroorotate	21.6961	20.5819	36.3818	17.4561	19.4362
Nucleotide	Pyrimidine Metabolism, Orotate containing	orotate	10.1711	13.5089	<1.5	11.4657	9.85921
Nucleotide	Pyrimidine Metabolism, Orotate containing	orotidine	<1.5	<1.5	5.67332	<1.5	<1.5
Nucleotide	Pyrimidine Metabolism, Thymine containing	thymine	2.49781	2.07207	12.2463	2.20513	1.88571
Nucleotide	Pyrimidine Metabolism, Uracil containing	UMP	1.54897	2.71433	3.28536	2.1657	2.54196
Nucleotide	Pyrimidine Metabolism, Uracil containing	uridine 3'-monophosphate (3'-UMP)	3.03816	3.63807	1.80691	3.64307	3.24609
Nucleotide	Pyrimidine Metabolism, Uracil containing	5,6-dihydrouridine	2.4215	<1.5	1.57124	2.00758	1.62786
Peptide	Gamma-glutamyl Amino Acid	gamma-glutamylhistidine	<1.5	<1.5	2.55842	<1.5	2.24184
Xenobiotics	Benzoate Metabolism	hippurate	5.38326	3.73067	5.08038	5.57979	4.73672
Xenobiotics	Chemical	thioproline	2.99337	2.64386	2.67458	2.72533	2.27424
Xenobiotics	Drug - Other	S-carboxymethyl-L-cysteine	<1.5	<1.5	1.58095	<1.5	<1.5
Xenobiotics	Food Component/Plant	3-dehydroshikimate	13.7498	6.65816	<1.5	6.53024	6.81722
Xenobiotics	Food Component/Plant	1-kestose	589.626	547.745	552.433	548.517	451.684
Xenobiotics	Food Component/Plant	2,3-dihydroxyisovalerate	9.7277	9.55394	12.3176	8.3421	9.17706
Xenobiotics	Food Component/Plant	4-hydroxybenzyl alcohol	1.79011	<1.5	<1.5	<1.5	<1.5
Xenobiotics	Food Component/Plant	quinate	3.37127	2.00093	<1.5	2.10453	2.19302
Xenobiotics	Food Component/Plant	homocitrate	2.09859	2.20307	3.32306	2.33507	3.99893
Xenobiotics	Food Component/Plant	syringol	41.6422	49.4831	37.4056	47.9956	44.9097

## Sheet: Table S3
Table S3. A heat map of metabolites identified in culture supernatant of Bacillus individual strains or strain consortia grown in minimal media
Numbes indicate the fold-increase in metabolite intensities compared to media control
Super Pathway	Pathway	Metabolite	Ba PTA84	Ba PTA85	Bs PTA86	Ba PTA84+Ba PTA85	Ba PTA84+Ba PTA85+Bs PTA86
Amino Acid	Alanine and Aspartate Metabolism	N-acetylalanine	4.48037	3.35858	3.75733	3.54689	3.69466
Amino Acid	Alanine and Aspartate Metabolism	asparagine	21.6074	11.7325	22.8441	7.0628	13.1294
Amino Acid	Alanine and Aspartate Metabolism	N-acetylasparagine	4.08417	10.1552	6.72936	7.25674	10.8805
Amino Acid	Alanine and Aspartate Metabolism	N-carbamoylalanine	<1.5	1.65023	1.59174	<1.5	2.16289
Amino Acid	Alanine and Aspartate Metabolism	N-acetylaspartate (NAA)	<1.5	9.08684	2.94864	8.77767	2.3811
Amino Acid	Creatine Metabolism	guanidinoacetate	1.76714	<1.5	3.04289	1.70372	5.79902
Amino Acid	Glutamate Metabolism	glutamine	2.09098	<1.5	<1.5	<1.5	<1.5
Amino Acid	Glutamate Metabolism	4-hydroxyglutamate	2.69421	1.67592	2.16345	3.09932	<1.5
Amino Acid	Glutamate Metabolism	S-1-pyrroline-5-carboxylate	2.29778	12.6662	6.38831	<1.5	15.0285
Amino Acid	Glutamate Metabolism	succinylglutamine	37.8853	71.9726	59.7982	33.5663	103.683
Amino Acid	Glutamate Metabolism	N-acetylglutamate	<1.5	3.55575	<1.5	2.18939	2.9937
Amino Acid	Glutamate Metabolism	N-acetylglutamine	<1.5	7.97588	1.87381	4.99641	6.1481
Amino Acid	Glutamate Metabolism	beta-citrylglutamate	<1.5	1.69792	1.61012	1.64256	2.60599
Amino Acid	Glutamate Metabolism	2-pyrrolidinone	<1.5	8.95658	2.98815	1.53306	8.81967
Amino Acid	Glutamate Metabolism	carboxyethyl-GABA	<1.5	<1.5	2.26927	<1.5	2.39442
Amino Acid	Glutamate Metabolism	N-methyl-GABA	<1.5	<1.5	1.84948	<1.5	2.49742
Amino Acid	Glutamate Metabolism	alpha-ketoglutaramate*	<1.5	<1.5	<1.5	<1.5	1.57752
Amino Acid	Glutathione Metabolism	2-hydroxybutyrate/2-hydroxyisobutyrate	34.1592	7.29555	22.5433	40.4464	10.076
Amino Acid	Glutathione Metabolism	cysteinylglycine	<1.5	<1.5	7.97696	3.20839	8.85232
Amino Acid	Glycine, Serine and Threonine Metabolism	betaine	41.8491	17.4153	97.4262	5.6383	18.9399
Amino Acid	Glycine, Serine and Threonine Metabolism	N-acetylserine	22.9897	18.825	24.7645	27.4458	20.7909
Amino Acid	Glycine, Serine and Threonine Metabolism	2-methylserine	11.018	18.1777	11.9432	8.54379	17.2528
Amino Acid	Glycine, Serine and Threonine Metabolism	N-acetylthreonine	25.8228	24.6764	26.0238	31.7628	29.6552
Amino Acid	Glycine, Serine and Threonine Metabolism	allo-threonine	<1.5	1.95096	<1.5	1.88408	1.69762
Amino Acid	Glycine, Serine and Threonine Metabolism	N-carbamoylserine	<1.5	<1.5	<1.5	<1.5	2.60778
Amino Acid	Guanidino and Acetamido Metabolism	4-guanidinobutanoate	<1.5	2.06445	2.07742	1.79006	2.84447
Amino Acid	Histidine Metabolism	N-acetylhistidine	11.7777	23.0403	17.9096	58.1965	27.3504
Amino Acid	Histidine Metabolism	trans-urocanate	12.3453	728.998	35.5419	301.515	461.264
Amino Acid	Histidine Metabolism	cis-urocanate	2.46213	66.0731	3.75664	27.5784	35.4834
Amino Acid	Histidine Metabolism	4-imidazoleacetate	1.90655	5.20028	3.16652	3.42583	4.70448
Amino Acid	Histidine Metabolism	3-methylhistidine	<1.5	1.54317	3.74796	<1.5	4.79163
Amino Acid	Histidine Metabolism	formiminoglutamate	<1.5	60.3142	2.31495	20.4335	31.9594
Amino Acid	Histidine Metabolism	imidazole lactate	<1.5	<1.5	1.94723	<1.5	2.53603
Amino Acid	Histidine Metabolism	histidine	<1.5	<1.5	<1.5	1.72397	1.62558
Amino Acid	Leucine, Isoleucine and Valine Metabolism	N-acetylleucine	9.755	28.2213	16.7644	25.7482	53.9027
Amino Acid	Leucine, Isoleucine and Valine Metabolism	1-carboxyethylleucine	377.304	117.487	352.66	318.2	315.779
Amino Acid	Leucine, Isoleucine and Valine Metabolism	alpha-hydroxyisocaproate	11.9281	17.469	25.4127	7.58638	33.6092
Amino Acid	Leucine, Isoleucine and Valine Metabolism	isovalerylglycine	2.04464	1.70581	2.5226	4.00248	3.18164
Amino Acid	Leucine, Isoleucine and Valine Metabolism	1-carboxyethylisoleucine	309.617	142.878	286.979	372.213	227.127
Amino Acid	Leucine, Isoleucine and Valine Metabolism	N-acetylvaline	11.7578	149.662	29.6978	82.2538	120.957
Amino Acid	Leucine, Isoleucine and Valine Metabolism	1-carboxyethylvaline	206.836	78.8497	189.354	226.723	167.824
Amino Acid	Leucine, Isoleucine and Valine Metabolism	3-methyl-2-oxobutyrate	2.42909	18.0724	6.9058	7.08127	18.815
Amino Acid	Leucine, Isoleucine and Valine Metabolism	alpha-hydroxyisovalerate	36.7557	112.368	130.003	49.051	106.166
Amino Acid	Leucine, Isoleucine and Valine Metabolism	isovalerate (C5)	<1.5	4.49454	<1.5	1.73562	3.63815
Amino Acid	Leucine, Isoleucine and Valine Metabolism	N-acetylisoleucine	<1.5	12.4442	2.42214	21.6028	9.41501
Amino Acid	Leucine, Isoleucine and Valine Metabolism	N-butyryl-isoleucine	<1.5	2.27341	3.09897	<1.5	2.37432
Amino Acid	Leucine, Isoleucine and Valine Metabolism	3-methyl-2-oxovalerate	<1.5	2.92318	1.61168	2.04873	3.16896
Amino Acid	Leucine, Isoleucine and Valine Metabolism	2-hydroxy-3-methylvalerate	<1.5	4.51314	2.69666	<1.5	3.47628
Amino Acid	Leucine, Isoleucine and Valine Metabolism	methylsuccinate	<1.5	3.08872	<1.5	1.75413	2.20807
Amino Acid	Leucine, Isoleucine and Valine Metabolism	isobutyrylglycine (C4)	<1.5	4.52008	4.7599	4.6221	5.65627
Amino Acid	Leucine, Isoleucine and Valine Metabolism	N-butyryl-leucine	<1.5	<1.5	2.20699	<1.5	2.75432
Amino Acid	Leucine, Isoleucine and Valine Metabolism	valine	<1.5	<1.5	<1.5	1.60553	1.72148
Amino Acid	Leucine, Isoleucine and Valine Metabolism	4-methyl-2-oxopentanoate	<1.5	<1.5	<1.5	<1.5	2.49025
Amino Acid	Leucine, Isoleucine and Valine Metabolism	N-carbamoylvaline	<1.5	<1.5	<1.5	<1.5	1.77812
Amino Acid	Lysine Metabolism	N6-acetyllysine	19.4975	31.2529	18.6911	23.9117	28.8115
Amino Acid	Lysine Metabolism	pipecolate	6.26541	8.50368	13.1306	9.15097	17.8771
Amino Acid	Lysine Metabolism	N,N-dimethyl-5-aminovalerate	1.5281	<1.5	5.77734	<1.5	3.66551
Amino Acid	Lysine Metabolism	N2-acetyllysine	<1.5	1.67562	<1.5	1.81309	1.53724
Amino Acid	Lysine Metabolism	N6,N6,N6-trimethyllysine	<1.5	2.42023	1.93526	<1.5	3.6596
Amino Acid	Lysine Metabolism	saccharopine	<1.5	1.82182	3.03252	<1.5	4.8514
Amino Acid	Lysine Metabolism	6-oxopiperidine-2-carboxylate	<1.5	1.65668	2.08133	<1.5	2.82159
Amino Acid	Lysine Metabolism	N-acetyl-cadaverine	<1.5	1.81481	<1.5	1.90312	<1.5
Amino Acid	Lysine Metabolism	N6-methyllysine	<1.5	<1.5	<1.5	<1.5	2.19662
Amino Acid	Lysine Metabolism	N6,N6-dimethyllysine	<1.5	<1.5	<1.5	<1.5	2.0253
Amino Acid	Lysine Metabolism	cadaverine	<1.5	<1.5	<1.5	<1.5	1.50085
Amino Acid	Methionine, Cysteine, SAM and Taurine Metabolism	N-acetylmethionine	4.16374	10.9292	6.14015	17.1025	13.1316
Amino Acid	Methionine, Cysteine, SAM and Taurine Metabolism	N-formylmethionine	16.3177	23.895	21.9741	24.2715	30.2787
Amino Acid	Methionine, Cysteine, SAM and Taurine Metabolism	methionine sulfone	5.02939	3.31773	2.41266	<1.5	3.34242
Amino Acid	Methionine, Cysteine, SAM and Taurine Metabolism	N-acetylmethionine sulfoxide	74.4731	276.828	129.631	195.538	310.268
Amino Acid	Methionine, Cysteine, SAM and Taurine Metabolism	homocysteine	55.3686	58.8003	36.8771	8.61542	44.2282
Amino Acid	Methionine, Cysteine, SAM and Taurine Metabolism	homocystine	12.6702	105.174	23.3248	2.78513	75.9012
Amino Acid	Methionine, Cysteine, SAM and Taurine Metabolism	cysteine	110.618	60.3651	111.548	35.5641	105.41
Amino Acid	Methionine, Cysteine, SAM and Taurine Metabolism	N-acetylcysteine	1.86371	<1.5	1.72645	<1.5	1.95392
Amino Acid	Methionine, Cysteine, SAM and Taurine Metabolism	3-sulfo-L-alanine	1.78455	<1.5	1.65746	1.95546	<1.5
Amino Acid	Methionine, Cysteine, SAM and Taurine Metabolism	S-adenosylmethionine (SAM)	<1.5	4.19687	<1.5	2.03517	3.73597
Amino Acid	Methionine, Cysteine, SAM and Taurine Metabolism	2-hydroxy-4-(methylthio)butanoic acid	<1.5	1.62386	3.84077	2.38985	2.05115
Amino Acid	Methionine, Cysteine, SAM and Taurine Metabolism	S-methylcysteine	<1.5	<1.5	2.58817	<1.5	<1.5
Amino Acid	Phenylalanine Metabolism	N-acetylphenylalanine	8.40422	42.6124	15.957	56.6008	39.6421
Amino Acid	Phenylalanine Metabolism	1-carboxyethylphenylalanine	18.6643	7.06587	16.2639	13.7717	12.1316
Amino Acid	Phenylalanine Metabolism	phenylpyruvate	2.88062	10.2038	3.69087	4.63961	8.40308
Amino Acid	Phenylalanine Metabolism	phenyllactate (PLA)	25.1442	24.9292	35.3895	88.6493	49.6891
Amino Acid	Phenylalanine Metabolism	phenylalanine	<1.5	1.61957	<1.5	<1.5	1.67444
Amino Acid	Phenylalanine Metabolism	N-succinyl-phenylalanine	<1.5	2.94575	2.54064	<1.5	5.37131
Amino Acid	Phenylalanine Metabolism	phenethylamine	<1.5	2.02918	<1.5	1.71627	2.1492
Amino Acid	Phenylalanine Metabolism	phenylacetate	<1.5	1.61679	<1.5	1.71102	1.73309
Amino Acid	Phenylalanine Metabolism	N-butyryl-phenylalanine	<1.5	<1.5	2.13017	<1.5	2.53094
Amino Acid	Phenylalanine Metabolism	2-hydroxyphenylacetate	<1.5	<1.5	<1.5	<1.5	2.23718
Amino Acid	Polyamine Metabolism	agmatine	6.47591	8.21808	8.87082	4.12094	12.8118
Amino Acid	Polyamine Metabolism	spermidine	58.794	325.104	139.428	650.559	197.627
Amino Acid	Polyamine Metabolism	(N(1) + N(8))-acetylspermidine	<1.5	3.88946	1.77019	1.73951	3.69611
Amino Acid	Polyamine Metabolism	spermine	<1.5	4.05469	<1.5	12.7759	1.96614
Amino Acid	Polyamine Metabolism	5-methylthioadenosine (MTA)	<1.5	4.8456	<1.5	2.8303	3.83992
Amino Acid	Polyamine Metabolism	4-acetamidobutanoate	<1.5	196.696	38.0518	1.7029	180.695
Amino Acid	Polyamine Metabolism	putrescine	<1.5	<1.5	2.4183	<1.5	2.57459
Amino Acid	Polyamine Metabolism	acetylagmatine	<1.5	<1.5	<1.5	<1.5	1.56941
Amino Acid	Polyamine Metabolism	N-acetylputrescine	<1.5	<1.5	<1.5	<1.5	1.86721
Amino Acid	Polyamine Metabolism	N(1)-acetylspermine	<1.5	<1.5	<1.5	<1.5	2.60241
Amino Acid	Tryptophan Metabolism	tryptophan	12.8707	4.35012	33.2011	35.9832	43.7058
Amino Acid	Tryptophan Metabolism	anthranilate	2.58559	<1.5	<1.5	12.7318	<1.5
Amino Acid	Tryptophan Metabolism	kynurenine	<1.5	1.98546	1.53981	1.89251	2.57588
Amino Acid	Tryptophan Metabolism	kynurenate	<1.5	1.52113	<1.5	<1.5	1.78531
Amino Acid	Tryptophan Metabolism	picolinate	<1.5	2.3339	1.84982	<1.5	1.76348
Amino Acid	Tryptophan Metabolism	indolelactate	<1.5	<1.5	1.54555	2.8202	3.71252
Amino Acid	Tryptophan Metabolism	N-acetyltryptophan	<1.5	<1.5	<1.5	3.02297	2.17699
Amino Acid	Tyrosine Metabolism	N-acetyltyrosine	3.58784	19.2588	6.83717	22.7393	21.1176
Amino Acid	Tyrosine Metabolism	1-carboxyethyltyrosine	1.51694	<1.5	1.51477	2.41784	<1.5
Amino Acid	Tyrosine Metabolism	4-hydroxyphenylpyruvate	1.89411	14.2457	4.44956	2.7365	19.5968
Amino Acid	Tyrosine Metabolism	3-(4-hydroxyphenyl)lactate (HPLA)	7.7626	11.4489	12.3343	34.8415	20.9278
Amino Acid	Tyrosine Metabolism	3-methoxytyramine	1.50455	5.23895	2.15529	<1.5	4.16908
Amino Acid	Tyrosine Metabolism	tyrosine	<1.5	1.68208	1.51447	1.83216	1.80878
Amino Acid	Tyrosine Metabolism	tyramine	<1.5	1.67641	<1.5	<1.5	<1.5
Amino Acid	Tyrosine Metabolism	o-Tyrosine	<1.5	1.65625	<1.5	<1.5	1.97827
Amino Acid	Tyrosine Metabolism	tyrosol	<1.5	<1.5	<1.5	<1.5	1.87582
Amino Acid	Tyrosine Metabolism	N-formylphenylalanine	<1.5	<1.5	<1.5	<1.5	1.53545
Amino Acid	Urea cycle; Arginine and Proline Metabolism	ornithine	19.1891	17.3138	36.6073	46.6839	43.6507
Amino Acid	Urea cycle; Arginine and Proline Metabolism	3-amino-2-piperidone	1.55272	<1.5	1.92252	<1.5	2.07971
Amino Acid	Urea cycle; Arginine and Proline Metabolism	citrulline	29.0136	21.6037	26.0101	8.83024	21.6402
Amino Acid	Urea cycle; Arginine and Proline Metabolism	N-acetylarginine	64.3375	190.366	99.4541	112.536	179.657
Amino Acid	Urea cycle; Arginine and Proline Metabolism	N-acetylcitrulline	5.73083	45.016	8.72132	7.46917	32.7386
Amino Acid	Urea cycle; Arginine and Proline Metabolism	N-acetylproline	2.92391	14.1429	5.24545	5.57969	13.4109
Amino Acid	Urea cycle; Arginine and Proline Metabolism	N-delta-acetylornithine	7.94524	13.6178	9.34085	13.4219	13.0212
Amino Acid	Urea cycle; Arginine and Proline Metabolism	N-alpha-acetylornithine	3.04576	8.1319	4.0727	6.64905	5.69125
Amino Acid	Urea cycle; Arginine and Proline Metabolism	urea	<1.5	1.81086	1.74906	3.24114	2.68939
Amino Acid	Urea cycle; Arginine and Proline Metabolism	dimethylarginine (ADMA + SDMA)	<1.5	1.76002	2.01353	<1.5	4.01834
Amino Acid	Urea cycle; Arginine and Proline Metabolism	hydroxyproline	<1.5	3.51138	1.97854	2.31603	4.70474
Amino Acid	Urea cycle; Arginine and Proline Metabolism	2-oxoarginine*	<1.5	<1.5	1.6881	1.55494	2.19378
Amino Acid	Urea cycle; Arginine and Proline Metabolism	N,N,N-trimethyl-alanylproline betaine (TMAP)	<1.5	<1.5	3.60213	<1.5	4.38236
Amino Acid	Urea cycle; Arginine and Proline Metabolism	N-monomethylarginine	<1.5	<1.5	2.40165	<1.5	4.59805
Amino Acid	Urea cycle; Arginine and Proline Metabolism	argininate*	<1.5	<1.5	1.61682	<1.5	2.02895
Amino Acid	Urea cycle; Arginine and Proline Metabolism	homocitrulline	<1.5	<1.5	<1.5	<1.5	2.58269
Carbohydrate	Aminosugar Metabolism	N-acetylmuramate	3.84651	67.7263	143.782	34.2468	22.1153
Carbohydrate	Aminosugar Metabolism	erythronate*	1.74122	2.41091	1.94278	1.94637	2.79419
Carbohydrate	Aminosugar Metabolism	glucuronate	<1.5	2.69078	<1.5	2.76309	3.6616
Carbohydrate	Aminosugar Metabolism	N-acetyl-glucosamine 1-phosphate	<1.5	3.60059	<1.5	<1.5	3.9868
Carbohydrate	Aminosugar Metabolism	N-acetylglucosamine/N-acetylgalactosamine	<1.5	34.5899	12.7227	2.73096	17.3398
Carbohydrate	Disaccharides and Oligosaccharides	sucrose	<1.5	2.04169	<1.5	8.17326	<1.5
Carbohydrate	Fructose, Mannose and Galactose Metabolism	mannitol/sorbitol	3.57034	6.68831	6.31644	4.65632	8.87495
Carbohydrate	Fructose, Mannose and Galactose Metabolism	galactonate	<1.5	1.7729	1.59733	<1.5	4.00274
Carbohydrate	Fructose, Mannose and Galactose Metabolism	mannose	<1.5	<1.5	2.09412	<1.5	2.95562
Carbohydrate	Fructose, Mannose and Galactose Metabolism	fructose	<1.5	<1.5	<1.5	<1.5	1.71314
Carbohydrate	Glycolysis, Gluconeogenesis, and Pyruvate Metabolism	3-phosphoglycerate	2.14376	7.08174	3.25173	3.13615	8.82283
Carbohydrate	Glycolysis, Gluconeogenesis, and Pyruvate Metabolism	lactate	192.992	65.976	157.842	86.8921	99.8911
Carbohydrate	Glycolysis, Gluconeogenesis, and Pyruvate Metabolism	Isobar: hexose diphosphates	<1.5	1.97538	2.08755	2.77326	4.13418
Carbohydrate	Glycolysis, Gluconeogenesis, and Pyruvate Metabolism	dihydroxyacetone phosphate (DHAP)	<1.5	1.85379	1.95864	<1.5	2.54516
Carbohydrate	Glycolysis, Gluconeogenesis, and Pyruvate Metabolism	phosphoenolpyruvate (PEP)	<1.5	7.68374	<1.5	<1.5	3.34474
Carbohydrate	Glycolysis, Gluconeogenesis, and Pyruvate Metabolism	glycerate	<1.5	2.10613	1.60105	<1.5	2.12328
Carbohydrate	Glycolysis, Gluconeogenesis, and Pyruvate Metabolism	pyruvate	<1.5	<1.5	4.4674	4.25982	6.0819
Carbohydrate	Glycolysis, Gluconeogenesis, and Pyruvate Metabolism	glucose 6-phosphate	<1.5	<1.5	<1.5	<1.5	3.65717
Carbohydrate	Pentose Metabolism	ribonate	17.2867	24.4723	15.7722	12.3141	28.3933
Carbohydrate	Pentose Metabolism	arabitol/xylitol	2.10586	2.54886	1.78373	<1.5	2.63904
Carbohydrate	Pentose Metabolism	arabonate/xylonate	2.52687	3.3127	4.06778	2.77683	7.09192
Carbohydrate	Pentose Metabolism	sedoheptulose	1.68738	3.0777	1.55867	<1.5	2.44244
Carbohydrate	Pentose Metabolism	ribulonate/xylulonate/lyxonate*	<1.5	<1.5	1.78802	<1.5	2.81936
Carbohydrate	Pentose Metabolism	ribitol	<1.5	<1.5	<1.5	<1.5	2.58269
Carbohydrate	Pentose Phosphate Pathway	sedoheptulose-7-phosphate	<1.5	1.6524	<1.5	<1.5	2.25505
Cofactors and Vitamins	Ascorbate and Aldarate Metabolism	gulonate*	44.0434	7.59102	44.6736	48.7276	13.2415
Cofactors and Vitamins	Ascorbate and Aldarate Metabolism	threonate	<1.5	1.56778	<1.5	<1.5	1.98058
Cofactors and Vitamins	Ascorbate and Aldarate Metabolism	oxalate (ethanedioate)	<1.5	<1.5	2.71202	2.70194	<1.5
Cofactors and Vitamins	Ascorbate and Aldarate Metabolism	glucarate (saccharate)	<1.5	<1.5	<1.5	<1.5	2.14785
Cofactors and Vitamins	Nicotinate and Nicotinamide Metabolism	nicotinate	8.04099	159.703	67.9145	<1.5	100.881
Cofactors and Vitamins	Nicotinate and Nicotinamide Metabolism	nicotinate ribonucleoside	3.78745	68.3001	18.8913	6.46006	43.8838
Cofactors and Vitamins	Nicotinate and Nicotinamide Metabolism	nicotinic acid mononucleotide (NaMN)	3.14303	4.89002	3.65123	4.6837	2.20508
Cofactors and Vitamins	Nicotinate and Nicotinamide Metabolism	nicotinamide	32.8114	38.7311	49.4032	29.5889	35.4755
Cofactors and Vitamins	Nicotinate and Nicotinamide Metabolism	nicotinamide ribonucleotide (NMN)	13.2541	<1.5	3.60279	12.8045	<1.5
Cofactors and Vitamins	Nicotinate and Nicotinamide Metabolism	nicotinamide riboside	2.08901	1.60883	3.16456	<1.5	1.75372
Cofactors and Vitamins	Nicotinate and Nicotinamide Metabolism	trigonelline (N'-methylnicotinate)	98.3258	110.887	205.367	115.567	248.25
Cofactors and Vitamins	Nicotinate and Nicotinamide Metabolism	NAD+	<1.5	<1.5	<1.5	2.00127	<1.5
Cofactors and Vitamins	Pantothenate and CoA Metabolism	pantoate	61.3868	166.206	129.983	89.7919	273.697
Cofactors and Vitamins	Pantothenate and CoA Metabolism	pantothenate (Vitamin B5)	<1.5	3.92223	2.53944	2.74462	6.46418
Cofactors and Vitamins	Pantothenate and CoA Metabolism	pantetheine	<1.5	<1.5	<1.5	<1.5	1.51673
Cofactors and Vitamins	Pterin Metabolism	pterin	<1.5	4.65607	1.71452	3.70247	3.83177
Cofactors and Vitamins	Thiamine Metabolism	5-(2-Hydroxyethyl)-4-methylthiazole	1.63185	<1.5	<1.5	<1.5	<1.5
Cofactors and Vitamins	Thiamine Metabolism	hydroxymethylpyrimidine	6.51688	<1.5	6.87879	6.96253	<1.5
Cofactors and Vitamins	Vitamin B6 Metabolism	pyridoxamine	1.56198	<1.5	<1.5	<1.5	<1.5
Cofactors and Vitamins	Vitamin B6 Metabolism	pyridoxate	1.85834	2.58895	2.31412	<1.5	2.53631
Cofactors and Vitamins	Vitamin B6 Metabolism	pyridoxamine phosphate	<1.5	2.04683	1.79272	1.71142	1.67998
Cofactors and Vitamins	Vitamin B6 Metabolism	pyridoxine (Vitamin B6)	<1.5	<1.5	2.13573	<1.5	3.10796
Energy	TCA Cycle	alpha-ketoglutarate	30.0773	26.5761	29.1783	<1.5	34.1609
Energy	TCA Cycle	succinate	64.0035	10.6175	76.6508	37.4186	66.2242
Energy	TCA Cycle	malate	1.61134	<1.5	1.68866	1.694	6.41897
Energy	TCA Cycle	tricarballylate	2.52086	1.70239	<1.5	1.93441	2.46431
Energy	TCA Cycle	citraconate/glutaconate	2.82111	15.5494	2.99824	3.04248	5.64851
Energy	TCA Cycle	aconitate [cis or trans]	<1.5	2.41341	2.1502	<1.5	2.93342
Energy	TCA Cycle	isocitric lactone	<1.5	<1.5	1.7934	<1.5	3.17646
Energy	TCA Cycle	fumarate	<1.5	<1.5	1.83683	2.56173	8.59173
Lipid	Carnitine Metabolism	deoxycarnitine	<1.5	<1.5	2.95541	2.88959	<1.5
Lipid	Fatty Acid Metabolism (Acyl Carnitine, Monounsaturated)	5-dodecenoylcarnitine (C12:1)	<1.5	35.8151	13.0044	<1.5	15.5396
Lipid	Fatty Acid Metabolism (also BCAA Metabolism)	methylmalonate (MMA)	1.99984	2.90701	3.23659	2.78405	3.97133
Lipid	Fatty Acid Synthesis	malonate	2.86704	5.04997	4.36506	<1.5	5.35464
Lipid	Fatty Acid, Amide	eicosenamide (20:1)*	2.51369	1.52952	87.8418	<1.5	1.56263
Lipid	Fatty Acid, Dicarboxylate	glutarate (C5-DC)	1.98923	2.60447	1.98573	2.39206	2.71292
Lipid	Fatty Acid, Dicarboxylate	2-hydroxyglutarate	21.3552	48.5694	29.2409	36.9753	56.5345
Lipid	Fatty Acid, Dicarboxylate	2-hydroxyadipate	2.75441	<1.5	2.74662	<1.5	3.84427
Lipid	Fatty Acid, Dicarboxylate	azelate (C9-DC)	2.04833	<1.5	<1.5	<1.5	<1.5
Lipid	Fatty Acid, Dihydroxy	2S,3R-dihydroxybutyrate	8.99378	9.52454	15.3373	9.7062	22.2713
Lipid	Fatty Acid, Dihydroxy	2R,3R-dihydroxybutyrate	<1.5	<1.5	<1.5	3.24263	<1.5
Lipid	Fatty Acid, Dihydroxy	3,4-dihydroxybutyrate	<1.5	<1.5	<1.5	<1.5	1.86539
Lipid	Fatty Acid, Monohydroxy	5-hydroxyhexanoate	2.82825	6.35693	4.08587	<1.5	9.86875
Lipid	Fatty Acid, Monohydroxy	3-hydroxyoctanoate	<1.5	1.80791	<1.5	<1.5	<1.5
Lipid	Fatty Acid, Monohydroxy	3-hydroxyhexanoate	<1.5	<1.5	<1.5	<1.5	1.72867
Lipid	Glycerolipid Metabolism	glycerol 3-phosphate	<1.5	3.74341	2.4305	2.3713	3.76606
Lipid	Glycerolipid Metabolism	glycerophosphoglycerol	<1.5	3.85238	4.58086	<1.5	6.62686
Lipid	Inositol Metabolism	chiro-inositol	<1.5	<1.5	4.64494	3.52178	14.5664
Lipid	Inositol Metabolism	myo-inositol	<1.5	<1.5	<1.5	<1.5	3.82583
Lipid	Lysophospholipid	1-palmitoyl-GPE (16:0)	<1.5	31.0276	80.5163	<1.5	15.3154
Lipid	Lysophospholipid	1-stearoyl-GPE (18:0)	<1.5	3.53743	2.25668	<1.5	<1.5
Lipid	Lysophospholipid	1-palmitoyl-GPG (16:0)*	<1.5	1.82553	2.41095	<1.5	<1.5
Lipid	Mevalonate Metabolism	mevalonolactone	8.30924	15.3456	11.5775	<1.5	13.6157
Lipid	Mevalonate Metabolism	3-hydroxy-3-methylglutarate	<1.5	<1.5	1.87043	<1.5	3.07929
Lipid	Mevalonate Metabolism	mevalonate	<1.5	<1.5	1.64198	<1.5	3.37264
Lipid	Monoacylglycerol	1-linoleoylglycerol (18:2)	<1.5	<1.5	2.32896	1.56028	1.82377
Lipid	Phospholipid Metabolism	choline	4.68425	<1.5	7.40041	4.65296	7.10958
Lipid	Phospholipid Metabolism	glycerophosphorylcholine (GPC)	19.9754	<1.5	54.113	70.5708	14.5705
Lipid	Phospholipid Metabolism	glycerophosphoethanolamine	<1.5	<1.5	1.64292	<1.5	3.00948
Lipid	Phospholipid Metabolism	glycerophosphoinositol*	<1.5	<1.5	<1.5	1.57447	2.79394
Lipid	Short Chain Fatty Acid	butyrate/isobutyrate (4:0)	<1.5	3.81784	<1.5	<1.5	2.19538
Nucleotide	Dinucleotide	(3'-5')-uridylyladenosine	2.23593	<1.5	<1.5	7.71786	<1.5
Nucleotide	Dinucleotide	(3'-5')-uridylyluridine	<1.5	<1.5	2.00168	4.36567	2.06618
Nucleotide	Dinucleotide	(3'-5')-cytidylyladenosine	<1.5	<1.5	<1.5	3.93246	<1.5
Nucleotide	Purine Metabolism, (Hypo)Xanthine/Inosine containing	hypoxanthine	25.4569	33.319	37.833	30.8162	46.1006
Nucleotide	Purine Metabolism, (Hypo)Xanthine/Inosine containing	xanthine	9.16746	29.6901	16.6963	69.4049	21.8969
Nucleotide	Purine Metabolism, (Hypo)Xanthine/Inosine containing	inosine	<1.5	3.67688	2.50041	2.04353	2.32359
Nucleotide	Purine Metabolism, (Hypo)Xanthine/Inosine containing	xanthosine	<1.5	2.48741	<1.5	<1.5	2.93381
Nucleotide	Purine Metabolism, (Hypo)Xanthine/Inosine containing	5-aminoimidazole-4-carboxamide	<1.5	<1.5	<1.5	5.69265	2.65706
Nucleotide	Purine Metabolism, Adenine containing	AMP	1.82276	<1.5	<1.5	40.3208	<1.5
Nucleotide	Purine Metabolism, Adenine containing	adenosine-2',3'-cyclic monophosphate	1.96997	<1.5	<1.5	1.59221	<1.5
Nucleotide	Purine Metabolism, Adenine containing	adenosine	8.91437	3.51092	3.98934	4.24707	<1.5
Nucleotide	Purine Metabolism, Adenine containing	adenine	646.011	162.152	253.266	178.376	74.3417
Nucleotide	Purine Metabolism, Adenine containing	1-methyladenine	<1.5	3.6166	1.76597	1.55145	3.72415
Nucleotide	Purine Metabolism, Adenine containing	N6-methyladenosine	<1.5	5.31898	3.19076	2.32053	2.829
Nucleotide	Purine Metabolism, Adenine containing	2'-O-methyladenosine	<1.5	3.11267	4.0942	<1.5	7.55187
Nucleotide	Purine Metabolism, Adenine containing	N6-succinyladenosine	<1.5	3.20122	2.31821	<1.5	5.94316
Nucleotide	Purine Metabolism, Adenine containing	2'-AMP	<1.5	<1.5	1.91032	<1.5	3.42277
Nucleotide	Purine Metabolism, Guanine containing	guanine	640.736	531.253	624.683	620.056	485.246
Nucleotide	Purine Metabolism, Guanine containing	guanosine	<1.5	2.67203	1.63433	3.51187	<1.5
Nucleotide	Purine Metabolism, Guanine containing	7-methylguanine	<1.5	5.41764	2.44559	2.12001	5.23958
Nucleotide	Purine Metabolism, Guanine containing	guanosine 2'-monophosphate (2'-GMP)*	<1.5	1.70532	1.885	<1.5	2.84409
Nucleotide	Pyrimidine Metabolism, Cytidine containing	cytidine 2' or 3'-monophosphate (2' or 3'-CMP)	2.32678	1.82372	2.78015	<1.5	3.49923
Nucleotide	Pyrimidine Metabolism, Cytidine containing	cytidine 2',3'-cyclic monophosphate	5.47825	<1.5	2.5186	1.75744	<1.5
Nucleotide	Pyrimidine Metabolism, Cytidine containing	cytidine	3.72886	2.80046	3.08976	8.19032	<1.5
Nucleotide	Pyrimidine Metabolism, Cytidine containing	cytosine	3.72285	3.51191	3.61598	3.4205	4.50052
Nucleotide	Pyrimidine Metabolism, Cytidine containing	5-methylcytidine	1.54669	2.38621	<1.5	1.75794	<1.5
Nucleotide	Pyrimidine Metabolism, Cytidine containing	CMP	<1.5	<1.5	<1.5	71.1766	<1.5
Nucleotide	Pyrimidine Metabolism, Cytidine containing	5-methylcytosine	<1.5	<1.5	<1.5	<1.5	2.31684
Nucleotide	Pyrimidine Metabolism, Orotate containing	dihydroorotate	30.5015	37.948	55.0309	70.727	65.7513
Nucleotide	Pyrimidine Metabolism, Orotate containing	orotate	7.12192	7.21882	8.09877	6.18215	9.34172
Nucleotide	Pyrimidine Metabolism, Orotate containing	N-carbamoylaspartate	<1.5	1.72429	<1.5	1.90867	1.79031
Nucleotide	Pyrimidine Metabolism, Orotate containing	orotidine	<1.5	2.24992	<1.5	2.0822	2.28663
Nucleotide	Pyrimidine Metabolism, Thymine containing	thymine	3.21053	7.92779	4.66027	9.67305	7.17264
Nucleotide	Pyrimidine Metabolism, Uracil containing	uridine-2',3'-cyclic monophosphate	7.75621	2.98818	5.01162	3.48358	<1.5
Nucleotide	Pyrimidine Metabolism, Uracil containing	uridine	2.30335	2.81296	1.83365	4.66601	<1.5
Nucleotide	Pyrimidine Metabolism, Uracil containing	uracil	106.661	88.2126	141.636	73.8383	138.999
Nucleotide	Pyrimidine Metabolism, Uracil containing	5,6-dihydrouridine	2.1173	7.37876	4.07963	2.50118	8.00275
Nucleotide	Pyrimidine Metabolism, Uracil containing	beta-alanine	2.33617	<1.5	2.46686	2.11706	<1.5
Nucleotide	Pyrimidine Metabolism, Uracil containing	pseudouridine	<1.5	3.13243	1.87473	<1.5	3.80354
Nucleotide	Pyrimidine Metabolism, Uracil containing	2'-O-methyluridine	<1.5	3.79555	2.72692	<1.5	6.4608
Nucleotide	Pyrimidine Metabolism, Uracil containing	uridine 2'-monophosphate (2'-UMP)*	<1.5	2.20671	1.9432	<1.5	4.64668
Nucleotide	Pyrimidine Metabolism, Uracil containing	3-ureidopropionate	<1.5	<1.5	1.62611	<1.5	<1.5
Nucleotide	Pyrimidine Metabolism, Uracil containing	UMP	<1.5	<1.5	<1.5	26.2747	<1.5
Partially Characterized Molecules	Partially Characterized Molecules	pentose acid*	<1.5	<1.5	2.22918	<1.5	3.85033
Peptide	Dipeptide	cyclo(his-phe)	4.30213	5.06962	7.31456	5.34979	10.6758
Peptide	Dipeptide	phenylalanylglycine	6.15665	<1.5	7.88337	<1.5	<1.5
Peptide	Dipeptide	tyrosylglycine	1.82585	<1.5	2.00865	<1.5	<1.5
Peptide	Dipeptide	valylglutamine	16.9561	<1.5	21.5456	3.19202	<1.5
Peptide	Dipeptide	leucylglutamine*	19.0194	<1.5	20.5665	2.44187	<1.5
Peptide	Dipeptide	cyclo(phe-pro)	<1.5	1.53768	<1.5	<1.5	<1.5
Peptide	Dipeptide	cyclo(phe-pro) (L,D)*	<1.5	1.74322	1.6145	1.59358	2.13219
Peptide	Dipeptide	cyclo(gly-phe)	<1.5	<1.5	2.34695	<1.5	3.38053
Peptide	Dipeptide	cyclo(gly-pro)	<1.5	<1.5	1.68019	1.51487	1.99393
Peptide	Dipeptide	tryptophylglycine	<1.5	<1.5	1.84342	<1.5	<1.5
Peptide	Dipeptide	cyclo(pro-tyr) (D,L)*	<1.5	<1.5	<1.5	<1.5	1.73997
Peptide	Gamma-glutamyl Amino Acid	gamma-glutamylphenylalanine	3.2071	<1.5	<1.5	<1.5	<1.5
Peptide	Gamma-glutamyl Amino Acid	gamma-glutamyltyrosine	4.56609	<1.5	<1.5	<1.5	<1.5
Xenobiotics	Benzoate Metabolism	hippurate	<1.5	1.83511	1.81032	2.22291	2.78548
Xenobiotics	Benzoate Metabolism	benzoate	<1.5	1.58598	<1.5	1.81564	<1.5
Xenobiotics	Benzoate Metabolism	4-hydroxybenzoate	<1.5	1.5297	1.66958	<1.5	<1.5
Xenobiotics	Chemical	thioproline	2.9132	<1.5	2.82453	<1.5	1.84429
Xenobiotics	Chemical	3-hydroxy-2-methylpyridine	5.32428	4.04623	5.7924	3.76202	6.86603
Xenobiotics	Chemical	ectoine	<1.5	2.0635	1.54642	<1.5	2.6066
Xenobiotics	Chemical	2,4-di-tert-butylphenol	<1.5	2.17379	<1.5	<1.5	<1.5
Xenobiotics	Drug - Other	S-carboxymethyl-L-cysteine	4.32416	7.90516	6.94051	5.34742	4.03243
Xenobiotics	Drug - Topical Agents	salicylate	<1.5	<1.5	1.65099	<1.5	2.27602
Xenobiotics	Drug - Topical Agents	2,6-dihydroxybenzoic acid	<1.5	<1.5	2.1339	<1.5	2.89917
Xenobiotics	Food Component/Plant	3-dehydroshikimate	3.19809	9.64319	4.18791	<1.5	6.5359
Xenobiotics	Food Component/Plant	1-kestose	9.66704	<1.5	4.29758	11.6163	<1.5
Xenobiotics	Food Component/Plant	quinate	1.78296	<1.5	<1.5	<1.5	1.57101
Xenobiotics	Food Component/Plant	histidine betaine (hercynine)*	1.61783	<1.5	2.82799	2.06443	4.13326
Xenobiotics	Food Component/Plant	3-indoleglyoxylic acid	1.67115	1.95633	2.45038	1.97659	3.03984
Xenobiotics	Food Component/Plant	maltol	<1.5	3.39702	5.69664	5.31104	3.90114
Xenobiotics	Food Component/Plant	2-piperidinone	<1.5	1.65374	1.97278	1.51301	1.84607
Xenobiotics	Food Component/Plant	2,3-dihydroxyisovalerate	<1.5	4.97199	5.34715	7.22222	3.65214
Xenobiotics	Food Component/Plant	2-isopropylmalate	<1.5	62.7774	2.00615	2.75007	2.94678
Xenobiotics	Food Component/Plant	4-hydroxybenzyl alcohol	<1.5	1.79203	<1.5	<1.5	<1.5
Xenobiotics	Food Component/Plant	beta-guanidinopropanoate	<1.5	1.78811	1.90991	1.51008	2.80589
Xenobiotics	Food Component/Plant	pyrraline	<1.5	1.74666	<1.5	<1.5	4.16909
Xenobiotics	Food Component/Plant	(S)-a-amino-omega-caprolactam	<1.5	1.59351	1.84865	<1.5	2.27656
Xenobiotics	Food Component/Plant	daidzein	<1.5	<1.5	1.82992	<1.5	<1.5
Xenobiotics	Food Component/Plant	mannonate*	<1.5	<1.5	<1.5	1.95031	<1.5
Xenobiotics	Food Component/Plant	histidinol	<1.5	<1.5	<1.5	<1.5	1.70687
Xenobiotics	Food Component/Plant	homocitrate	<1.5	<1.5	<1.5	<1.5	3.00251
Xenobiotics	Food Component/Plant	2-keto-3-deoxy-gluconate	<1.5	<1.5	<1.5	<1.5	2.17198

## Sheet: Table S4
Table S4. Metabolites uniquely secreted by individual strains or strain consortia in rich media
For individual strains, secreted metabolites with intensities >1.5 fold than remaining two strains on same media
For strain consortia, secreted metabolites with intensitries >1.5 fold than correspondiong individual strains
Super Pathway	Pathway	Metabolite	Ba PTA84	Ba PTA85	Bs PTA86	Ba PTA84+Ba PTA85	Ba PTA84+Ba PTA85+Bs PTA86
Amino Acid	Alanine and Aspartate Metabolism	N,N-dimethylalanine	0	0	0	0	1
Amino Acid	Glutamate Metabolism	N-acetylglutamine	0	0	1	0	0
Amino Acid	Glutathione Metabolism	glutathione, oxidized (GSSG)	0	0	1	0	0
Amino Acid	Glutathione Metabolism	2-hydroxybutyrate/2-hydroxyisobutyrate	0	0	1	0	0
Amino Acid	Glycine, Serine and Threonine Metabolism	N-acetylthreonine	0	0	1	0	0
Amino Acid	Glycine, Serine and Threonine Metabolism	N-acetylserine	0	0	1	0	0
Amino Acid	Histidine Metabolism	N-acetylhistidine	0	0	1	0	0
Amino Acid	Histidine Metabolism	trans-urocanate	0	0	1	0	0
Amino Acid	Leucine, Isoleucine and Valine Metabolism	N-acetylvaline	0	0	1	0	0
Amino Acid	Leucine, Isoleucine and Valine Metabolism	isovalerate (C5)	0	0	1	0	0
Amino Acid	Leucine, Isoleucine and Valine Metabolism	N-acetylisoleucine	0	0	1	0	0
Amino Acid	Lysine Metabolism	N-acetyl-cadaverine	0	0	1	0	0
Amino Acid	Lysine Metabolism	N6-acetyllysine	0	0	1	0	0
Amino Acid	Lysine Metabolism	N6,N6-dimethyllysine	0	0	0	1	0
Amino Acid	Methionine, Cysteine, SAM and Taurine Metabolism	S-methylcysteine	0	0	1	1	0
Amino Acid	Methionine, Cysteine, SAM and Taurine Metabolism	N-acetylmethionine	0	0	1	0	0
Amino Acid	Methionine, Cysteine, SAM and Taurine Metabolism	S-adenosylmethionine (SAM)	0	0	1	0	0
Amino Acid	Methionine, Cysteine, SAM and Taurine Metabolism	2-hydroxy-4-(methylthio)butanoic acid	0	0	1	0	0
Amino Acid	Phenylalanine Metabolism	N-acetylphenylalanine	0	0	1	0	0
Amino Acid	Phenylalanine Metabolism	phenyllactate (PLA)	0	0	1	0	0
Amino Acid	Polyamine Metabolism	acetylagmatine	0	0	1	0	0
Amino Acid	Tyrosine Metabolism	3-(4-hydroxyphenyl)lactate (HPLA)	0	0	1	0	0
Amino Acid	Urea cycle; Arginine and Proline Metabolism	N-acetylcitrulline	1	0	0	0	0
Amino Acid	Urea cycle; Arginine and Proline Metabolism	N-acetylarginine	0	0	1	0	0
Carbohydrate	Aminosugar Metabolism	glucuronate	0	0	1	0	0
Carbohydrate	Glycolysis, Gluconeogenesis, and Pyruvate Metabolism	Isobar: hexose diphosphates	0	0	0	0	1
Cofactors and Vitamins	Nicotinate and Nicotinamide Metabolism	nicotinamide ribonucleotide (NMN)	1	0	0	0	0
Cofactors and Vitamins	Nicotinate and Nicotinamide Metabolism	nicotinamide riboside	0	0	1	0	0
Cofactors and Vitamins	Nicotinate and Nicotinamide Metabolism	NAD+	0	0	1	0	0
Cofactors and Vitamins	Vitamin B6 Metabolism	pyridoxamine phosphate	0	0	1	0	0
Cofactors and Vitamins	Vitamin B6 Metabolism	pyridoxamine	0	0	1	0	0
Energy	TCA Cycle	succinate	1	0	0	0	0
Energy	TCA Cycle	alpha-ketoglutarate	1	0	0	0	0
Energy	TCA Cycle	2-methylcitrate	0	0	1	1	1
Energy	TCA Cycle	aconitate [cis or trans]	0	0	1	0	0
Lipid	Fatty Acid, Dihydroxy	2R,3R-dihydroxybutyrate	0	0	1	0	0
Lipid	Fatty Acid, Monohydroxy	5-hydroxyhexanoate	1	0	0	0	0
Lipid	Inositol Metabolism	inositol 1-phosphate (I1P)	1	0	0	0	0
Lipid	Monoacylglycerol	1-linoleoylglycerol (18:2)	0	1	0	0	0
Nucleotide	Dinucleotide	(3'-5')-adenylylguanosine*	0	0	0	0	1
Nucleotide	Purine Metabolism, (Hypo)Xanthine/Inosine containing	5-aminoimidazole-4-carboxamide	0	0	1	0	0
Nucleotide	Purine Metabolism, Adenine containing	N6-methyladenosine	1	0	0	0	0
Nucleotide	Purine Metabolism, Adenine containing	2'-O-methyladenosine	1	0	0	0	0
Nucleotide	Purine Metabolism, Guanine containing	guanine	1	0	0	0	0
Nucleotide	Purine Metabolism, Guanine containing	guanosine-2',3'-cyclic monophosphate	0	1	0	0	0
Nucleotide	Purine Metabolism, Guanine containing	guanosine 3'-monophosphate (3'-GMP)	0	1	0	0	0
Nucleotide	Pyrimidine Metabolism, Cytidine containing	cytidine 2',3'-cyclic monophosphate	0	1	0	0	0
Nucleotide	Pyrimidine Metabolism, Orotate containing	orotidine	0	0	1	0	0
Nucleotide	Pyrimidine Metabolism, Orotate containing	dihydroorotate	0	0	1	0	0
Nucleotide	Pyrimidine Metabolism, Orotate containing	N-carbamoylaspartate	0	0	1	0	0
Nucleotide	Pyrimidine Metabolism, Thymine containing	thymine	0	0	1	0	0
Nucleotide	Pyrimidine Metabolism, Uracil containing	5,6-dihydrouridine	1	0	0	0	0
Peptide	Gamma-glutamyl Amino Acid	gamma-glutamylhistidine	0	0	1	0	0
Xenobiotics	Food Component/Plant	quinate	1	0	0	0	0
Xenobiotics	Food Component/Plant	4-hydroxybenzyl alcohol	1	0	0	0	0
Xenobiotics	Food Component/Plant	3-dehydroshikimate	1	0	0	0	0
Xenobiotics	Food Component/Plant	homocitrate	0	0	1	0	0

## Sheet: Table S5
Table S5. Metabolites uniquely secreted by individual strains or strain consortia in minimal media
For individual strains, secreted metabolites with intensities >1.5 fold than remaining two strains on same media
For strain consortia, secreted metabolites with intensitries >1.5 fold than correspondiong individual strains
Super Pathway	Pathway	Metabolite	Ba PTA84	Ba PTA85	Bs PTA86	Ba PTA84+Ba PTA85	Ba PTA84+Ba PTA85+Bs PTA86
Amino Acid	Alanine and Aspartate Metabolism	N-acetylasparagine	0	1	0	0	0
Amino Acid	Alanine and Aspartate Metabolism	N-acetylaspartate (NAA)	0	1	0	0	0
Amino Acid	Creatine Metabolism	guanidinoacetate	0	0	1	0	1
Amino Acid	Glutamate Metabolism	glutamine	1	0	0	0	0
Amino Acid	Glutamate Metabolism	S-1-pyrroline-5-carboxylate	0	1	0	0	0
Amino Acid	Glutamate Metabolism	N-acetylglutamine	0	1	0	0	0
Amino Acid	Glutamate Metabolism	2-pyrrolidinone	0	1	0	0	0
Amino Acid	Glutamate Metabolism	N-acetylglutamate	0	1	0	0	0
Amino Acid	Glutamate Metabolism	carboxyethyl-GABA	0	0	1	0	0
Amino Acid	Glutamate Metabolism	beta-citrylglutamate	0	0	0	0	1
Amino Acid	Glutathione Metabolism	2-hydroxybutyrate/2-hydroxyisobutyrate	1	0	0	0	0
Amino Acid	Glutathione Metabolism	cysteinylglycine	0	0	1	1	0
Amino Acid	Glycine, Serine and Threonine Metabolism	2-methylserine	0	1	0	0	0
Amino Acid	Glycine, Serine and Threonine Metabolism	betaine	0	0	1	0	0
Amino Acid	Glycine, Serine and Threonine Metabolism	N-carbamoylserine	0	0	0	0	1
Amino Acid	Histidine Metabolism	cis-urocanate	0	1	0	0	0
Amino Acid	Histidine Metabolism	trans-urocanate	0	1	0	0	0
Amino Acid	Histidine Metabolism	formiminoglutamate	0	1	0	0	0
Amino Acid	Histidine Metabolism	4-imidazoleacetate	0	1	0	0	0
Amino Acid	Histidine Metabolism	3-methylhistidine	0	0	1	0	0
Amino Acid	Histidine Metabolism	N-acetylhistidine	0	0	0	1	0
Amino Acid	Histidine Metabolism	histidine	0	0	0	1	0
Amino Acid	Leucine, Isoleucine and Valine Metabolism	2-hydroxy-3-methylvalerate	0	1	0	0	0
Amino Acid	Leucine, Isoleucine and Valine Metabolism	N-acetylvaline	0	1	0	0	0
Amino Acid	Leucine, Isoleucine and Valine Metabolism	isovalerate (C5)	0	1	0	0	0
Amino Acid	Leucine, Isoleucine and Valine Metabolism	3-methyl-2-oxobutyrate	0	1	0	0	0
Amino Acid	Leucine, Isoleucine and Valine Metabolism	methylsuccinate	0	1	0	0	0
Amino Acid	Leucine, Isoleucine and Valine Metabolism	N-acetylleucine	0	1	0	0	1
Amino Acid	Leucine, Isoleucine and Valine Metabolism	N-acetylisoleucine	0	1	0	1	0
Amino Acid	Leucine, Isoleucine and Valine Metabolism	3-methyl-2-oxovalerate	0	1	0	0	0
Amino Acid	Leucine, Isoleucine and Valine Metabolism	N-butyryl-leucine	0	0	1	0	0
Amino Acid	Leucine, Isoleucine and Valine Metabolism	isovalerylglycine	0	0	0	1	0
Amino Acid	Leucine, Isoleucine and Valine Metabolism	4-methyl-2-oxopentanoate	0	0	0	0	1
Amino Acid	Lysine Metabolism	N6-acetyllysine	0	1	0	0	0
Amino Acid	Lysine Metabolism	N,N-dimethyl-5-aminovalerate	0	0	1	0	0
Amino Acid	Lysine Metabolism	pipecolate	0	0	1	0	0
Amino Acid	Lysine Metabolism	saccharopine	0	0	1	0	1
Amino Acid	Lysine Metabolism	cadaverine	0	0	0	0	1
Amino Acid	Lysine Metabolism	N6,N6,N6-trimethyllysine	0	0	0	0	1
Amino Acid	Lysine Metabolism	N6-methyllysine	0	0	0	0	1
Amino Acid	Lysine Metabolism	N6,N6-dimethyllysine	0	0	0	0	1
Amino Acid	Methionine, Cysteine, SAM and Taurine Metabolism	methionine sulfone	1	0	0	0	0
Amino Acid	Methionine, Cysteine, SAM and Taurine Metabolism	homocystine	0	1	0	0	0
Amino Acid	Methionine, Cysteine, SAM and Taurine Metabolism	N-acetylmethionine	0	1	0	1	0
Amino Acid	Methionine, Cysteine, SAM and Taurine Metabolism	S-adenosylmethionine (SAM)	0	1	0	0	0
Amino Acid	Methionine, Cysteine, SAM and Taurine Metabolism	N-acetylmethionine sulfoxide	0	1	0	0	0
Amino Acid	Methionine, Cysteine, SAM and Taurine Metabolism	S-methylcysteine	0	0	1	0	0
Amino Acid	Methionine, Cysteine, SAM and Taurine Metabolism	2-hydroxy-4-(methylthio)butanoic acid	0	0	1	0	0
Amino Acid	Phenylalanine Metabolism	N-acetylphenylalanine	0	1	0	0	0
Amino Acid	Phenylalanine Metabolism	phenylpyruvate	0	1	0	0	0
Amino Acid	Phenylalanine Metabolism	phenethylamine	0	1	0	0	0
Amino Acid	Phenylalanine Metabolism	N-butyryl-phenylalanine	0	0	1	0	0
Amino Acid	Phenylalanine Metabolism	phenyllactate (PLA)	0	0	0	1	0
Amino Acid	Phenylalanine Metabolism	2-hydroxyphenylacetate	0	0	0	0	1
Amino Acid	Phenylalanine Metabolism	N-succinyl-phenylalanine	0	0	0	0	1
Amino Acid	Polyamine Metabolism	spermine	0	1	0	1	0
Amino Acid	Polyamine Metabolism	spermidine	0	1	0	1	0
Amino Acid	Polyamine Metabolism	(N(1) + N(8))-acetylspermidine	0	1	0	0	0
Amino Acid	Polyamine Metabolism	5-methylthioadenosine (MTA)	0	1	0	0	0
Amino Acid	Polyamine Metabolism	4-acetamidobutanoate	0	1	0	0	0
Amino Acid	Polyamine Metabolism	putrescine	0	0	1	0	0
Amino Acid	Polyamine Metabolism	N(1)-acetylspermine	0	0	0	0	1
Amino Acid	Tryptophan Metabolism	anthranilate	1	0	0	1	0
Amino Acid	Tryptophan Metabolism	tryptophan	0	0	1	1	0
Amino Acid	Tryptophan Metabolism	N-acetyltryptophan	0	0	0	1	1
Amino Acid	Tryptophan Metabolism	indolelactate	0	0	0	1	1
Amino Acid	Tyrosine Metabolism	4-hydroxyphenylpyruvate	0	1	0	0	0
Amino Acid	Tyrosine Metabolism	3-methoxytyramine	0	1	0	0	0
Amino Acid	Tyrosine Metabolism	tyramine	0	1	0	0	0
Amino Acid	Tyrosine Metabolism	N-acetyltyrosine	0	1	0	0	0
Amino Acid	Tyrosine Metabolism	3-(4-hydroxyphenyl)lactate (HPLA)	0	0	0	1	1
Amino Acid	Tyrosine Metabolism	1-carboxyethyltyrosine	0	0	0	1	0
Amino Acid	Urea cycle; Arginine and Proline Metabolism	N-acetylproline	0	1	0	0	0
Amino Acid	Urea cycle; Arginine and Proline Metabolism	N-alpha-acetylornithine	0	1	0	0	0
Amino Acid	Urea cycle; Arginine and Proline Metabolism	N-acetylcitrulline	0	1	0	0	0
Amino Acid	Urea cycle; Arginine and Proline Metabolism	N-acetylarginine	0	1	0	0	0
Amino Acid	Urea cycle; Arginine and Proline Metabolism	hydroxyproline	0	1	0	0	0
Amino Acid	Urea cycle; Arginine and Proline Metabolism	N,N,N-trimethyl-alanylproline betaine (TMAP)	0	0	1	0	0
Amino Acid	Urea cycle; Arginine and Proline Metabolism	ornithine	0	0	1	1	0
Amino Acid	Urea cycle; Arginine and Proline Metabolism	N-monomethylarginine	0	0	1	0	1
Amino Acid	Urea cycle; Arginine and Proline Metabolism	urea	0	0	0	1	0
Amino Acid	Urea cycle; Arginine and Proline Metabolism	dimethylarginine (ADMA + SDMA)	0	0	0	0	1
Amino Acid	Urea cycle; Arginine and Proline Metabolism	homocitrulline	0	0	0	0	1
Carbohydrate	Aminosugar Metabolism	N-acetyl-glucosamine 1-phosphate	0	1	0	0	0
Carbohydrate	Aminosugar Metabolism	N-acetylglucosamine/N-acetylgalactosamine	0	1	0	0	0
Carbohydrate	Aminosugar Metabolism	glucuronate	0	1	0	0	0
Carbohydrate	Aminosugar Metabolism	N-acetylmuramate	0	0	1	0	0
Carbohydrate	Disaccharides and Oligosaccharides	sucrose	0	1	0	1	0
Carbohydrate	Fructose, Mannose and Galactose Metabolism	mannose	0	0	1	0	0
Carbohydrate	Fructose, Mannose and Galactose Metabolism	galactonate	0	0	0	0	1
Carbohydrate	Fructose, Mannose and Galactose Metabolism	fructose	0	0	0	0	1
Carbohydrate	Glycolysis, Gluconeogenesis, and Pyruvate Metabolism	3-phosphoglycerate	0	1	0	0	0
Carbohydrate	Glycolysis, Gluconeogenesis, and Pyruvate Metabolism	phosphoenolpyruvate (PEP)	0	1	0	0	0
Carbohydrate	Glycolysis, Gluconeogenesis, and Pyruvate Metabolism	pyruvate	0	0	1	1	0
Carbohydrate	Glycolysis, Gluconeogenesis, and Pyruvate Metabolism	glucose 6-phosphate	0	0	0	0	1
Carbohydrate	Glycolysis, Gluconeogenesis, and Pyruvate Metabolism	Isobar: hexose diphosphates	0	0	0	0	1
Carbohydrate	Pentose Metabolism	sedoheptulose	0	1	0	0	0
Carbohydrate	Pentose Metabolism	ribulonate/xylulonate/lyxonate*	0	0	0	0	1
Carbohydrate	Pentose Metabolism	arabonate/xylonate	0	0	0	0	1
Carbohydrate	Pentose Metabolism	ribitol	0	0	0	0	1
Carbohydrate	Pentose Phosphate Pathway	sedoheptulose-7-phosphate	0	1	0	0	0
Cofactors and Vitamins	Ascorbate and Aldarate Metabolism	oxalate (ethanedioate)	0	0	1	1	0
Cofactors and Vitamins	Ascorbate and Aldarate Metabolism	glucarate (saccharate)	0	0	0	0	1
Cofactors and Vitamins	Nicotinate and Nicotinamide Metabolism	nicotinamide ribonucleotide (NMN)	1	0	0	0	0
Cofactors and Vitamins	Nicotinate and Nicotinamide Metabolism	nicotinate ribonucleoside	0	1	0	0	0
Cofactors and Vitamins	Nicotinate and Nicotinamide Metabolism	nicotinate	0	1	0	0	0
Cofactors and Vitamins	Nicotinate and Nicotinamide Metabolism	nicotinamide riboside	0	0	1	0	0
Cofactors and Vitamins	Nicotinate and Nicotinamide Metabolism	trigonelline (N'-methylnicotinate)	0	0	1	0	0
Cofactors and Vitamins	Nicotinate and Nicotinamide Metabolism	NAD+	0	0	0	1	0
Cofactors and Vitamins	Pantothenate and CoA Metabolism	pantothenate (Vitamin B5)	0	1	0	0	1
Cofactors and Vitamins	Pantothenate and CoA Metabolism	pantoate	0	0	0	0	1
Cofactors and Vitamins	Pterin Metabolism	pterin	0	1	0	0	0
Cofactors and Vitamins	Vitamin B6 Metabolism	pyridoxine (Vitamin B6)	0	0	1	0	0
Energy	TCA Cycle	citraconate/glutaconate	0	1	0	0	0
Energy	TCA Cycle	fumarate	0	0	0	1	1
Energy	TCA Cycle	isocitric lactone	0	0	0	0	1
Energy	TCA Cycle	malate	0	0	0	0	1
Lipid	Carnitine Metabolism	deoxycarnitine	0	0	1	1	0
Lipid	Fatty Acid Metabolism (Acyl Carnitine, Monounsaturated)	5-dodecenoylcarnitine (C12:1)	0	1	0	0	0
Lipid	Fatty Acid, Amide	eicosenamide (20:1)*	0	0	1	0	0
Lipid	Fatty Acid, Dicarboxylate	azelate (C9-DC)	1	0	0	0	0
Lipid	Fatty Acid, Dicarboxylate	2-hydroxyglutarate	0	1	0	0	0
Lipid	Fatty Acid, Dihydroxy	2S,3R-dihydroxybutyrate	0	0	1	0	0
Lipid	Fatty Acid, Dihydroxy	2R,3R-dihydroxybutyrate	0	0	0	1	0
Lipid	Fatty Acid, Monohydroxy	5-hydroxyhexanoate	0	1	0	0	1
Lipid	Fatty Acid, Monohydroxy	3-hydroxyoctanoate	0	1	0	0	0
Lipid	Fatty Acid, Monohydroxy	3-hydroxyhexanoate	0	0	0	0	1
Lipid	Glycerolipid Metabolism	glycerol 3-phosphate	0	1	0	0	0
Lipid	Inositol Metabolism	chiro-inositol	0	0	1	1	1
Lipid	Inositol Metabolism	myo-inositol	0	0	0	0	1
Lipid	Lysophospholipid	1-stearoyl-GPE (18:0)	0	1	0	0	0
Lipid	Lysophospholipid	1-palmitoyl-GPE (16:0)	0	0	1	0	0
Lipid	Mevalonate Metabolism	3-hydroxy-3-methylglutarate	0	0	1	0	1
Lipid	Mevalonate Metabolism	mevalonate	0	0	0	0	1
Lipid	Monoacylglycerol	1-linoleoylglycerol (18:2)	0	0	1	0	0
Lipid	Phospholipid Metabolism	choline	0	0	1	0	0
Lipid	Phospholipid Metabolism	glycerophosphorylcholine (GPC)	0	0	1	1	0
Lipid	Phospholipid Metabolism	glycerophosphoinositol*	0	0	0	0	1
Lipid	Phospholipid Metabolism	glycerophosphoethanolamine	0	0	0	0	1
Lipid	Short Chain Fatty Acid	butyrate/isobutyrate (4:0)	0	1	0	0	0
Nucleotide	Dinucleotide	(3'-5')-uridylyladenosine	1	0	0	1	0
Nucleotide	Dinucleotide	(3'-5')-uridylyluridine	0	0	1	1	0
Nucleotide	Dinucleotide	(3'-5')-cytidylyladenosine	0	0	0	1	0
Nucleotide	Purine Metabolism, (Hypo)Xanthine/Inosine containing	xanthine	0	1	0	1	0
Nucleotide	Purine Metabolism, (Hypo)Xanthine/Inosine containing	xanthosine	0	1	0	0	0
Nucleotide	Purine Metabolism, (Hypo)Xanthine/Inosine containing	5-aminoimidazole-4-carboxamide	0	0	0	1	1
Nucleotide	Purine Metabolism, Adenine containing	adenosine-2',3'-cyclic monophosphate	1	0	0	0	0
Nucleotide	Purine Metabolism, Adenine containing	adenosine	1	0	0	0	0
Nucleotide	Purine Metabolism, Adenine containing	adenine	1	0	0	0	0
Nucleotide	Purine Metabolism, Adenine containing	AMP	1	0	0	1	0
Nucleotide	Purine Metabolism, Adenine containing	N6-methyladenosine	0	1	0	0	0
Nucleotide	Purine Metabolism, Adenine containing	1-methyladenine	0	1	0	0	0
Nucleotide	Purine Metabolism, Adenine containing	2'-O-methyladenosine	0	0	0	0	1
Nucleotide	Purine Metabolism, Adenine containing	2'-AMP	0	0	0	0	1
Nucleotide	Purine Metabolism, Adenine containing	N6-succinyladenosine	0	0	0	0	1
Nucleotide	Purine Metabolism, Guanine containing	guanosine	0	1	0	0	0
Nucleotide	Purine Metabolism, Guanine containing	7-methylguanine	0	1	0	0	0
Nucleotide	Purine Metabolism, Guanine containing	guanosine 2'-monophosphate (2'-GMP)*	0	0	0	0	1
Nucleotide	Pyrimidine Metabolism, Cytidine containing	cytidine 2',3'-cyclic monophosphate	1	0	0	0	0
Nucleotide	Pyrimidine Metabolism, Cytidine containing	5-methylcytidine	0	1	0	0	0
Nucleotide	Pyrimidine Metabolism, Cytidine containing	CMP	0	0	0	1	0
Nucleotide	Pyrimidine Metabolism, Cytidine containing	cytidine	0	0	0	1	0
Nucleotide	Pyrimidine Metabolism, Cytidine containing	5-methylcytosine	0	0	0	0	1
Nucleotide	Pyrimidine Metabolism, Orotate containing	orotidine	0	1	0	0	0
Nucleotide	Pyrimidine Metabolism, Orotate containing	N-carbamoylaspartate	0	1	0	0	0
Nucleotide	Pyrimidine Metabolism, Orotate containing	dihydroorotate	0	0	0	1	0
Nucleotide	Pyrimidine Metabolism, Thymine containing	thymine	0	1	0	0	0
Nucleotide	Pyrimidine Metabolism, Uracil containing	uridine-2',3'-cyclic monophosphate	1	0	0	0	0
Nucleotide	Pyrimidine Metabolism, Uracil containing	pseudouridine	0	1	0	0	0
Nucleotide	Pyrimidine Metabolism, Uracil containing	5,6-dihydrouridine	0	1	0	0	0
Nucleotide	Pyrimidine Metabolism, Uracil containing	3-ureidopropionate	0	0	1	0	0
Nucleotide	Pyrimidine Metabolism, Uracil containing	UMP	0	0	0	1	0
Nucleotide	Pyrimidine Metabolism, Uracil containing	uridine	0	0	0	1	0
Nucleotide	Pyrimidine Metabolism, Uracil containing	uridine 2'-monophosphate (2'-UMP)*	0	0	0	0	1
Nucleotide	Pyrimidine Metabolism, Uracil containing	2'-O-methyluridine	0	0	0	0	1
Partially Characterized Molecules	Partially Characterized Molecules	pentose acid*	0	0	1	0	1
Peptide	Dipeptide	cyclo(gly-phe)	0	0	1	0	0
Peptide	Dipeptide	tryptophylglycine	0	0	1	0	0
Peptide	Gamma-glutamyl Amino Acid	gamma-glutamyltyrosine	1	0	0	0	0
Peptide	Gamma-glutamyl Amino Acid	gamma-glutamylphenylalanine	1	0	0	0	0
Xenobiotics	Benzoate Metabolism	benzoate	0	1	0	0	0
Xenobiotics	Benzoate Metabolism	hippurate	0	0	0	0	1
Xenobiotics	Chemical	2,4-di-tert-butylphenol	0	1	0	0	0
Xenobiotics	Drug - Topical Agents	2,6-dihydroxybenzoic acid	0	0	1	0	0
Xenobiotics	Food Component/Plant	1-kestose	1	0	0	0	0
Xenobiotics	Food Component/Plant	2-isopropylmalate	0	1	0	0	0
Xenobiotics	Food Component/Plant	4-hydroxybenzyl alcohol	0	1	0	0	0
Xenobiotics	Food Component/Plant	3-dehydroshikimate	0	1	0	0	0
Xenobiotics	Food Component/Plant	maltol	0	0	1	1	0
Xenobiotics	Food Component/Plant	histidine betaine (hercynine)*	0	0	1	0	0
Xenobiotics	Food Component/Plant	histidinol	0	0	0	0	1
Xenobiotics	Food Component/Plant	homocitrate	0	0	0	0	1
Xenobiotics	Food Component/Plant	pyrraline	0	0	0	0	1
Xenobiotics	Food Component/Plant	2-keto-3-deoxy-gluconate	0	0	0	0	1

## Sheet: Table S6.
Table S6. Putative digestive enzymes identified in the genomes of B. amyloliquefaciens PTA-84 and PTA85, and B. subtilis PTA-85
Gene Description	Accession Number	B. amyloliquefaciens PTA-84	B. amyloliquefaciens PTA-85	B. subtilis PTA-86
1,4-alpha-glucan branching enzyme GlgB	AGA22754.1	None	None	JS609_03093
6-phospho-beta-galactosidase	QDK89482.1	JS608_01655	JTE87_02630	None
6-phospho-beta-glucosidase GmuD	QDK91913.1	JS608_00187	JTE87_00044	JS609_00629
Alpha-amylase	BAT21551.1	JS608_00728	JTE87_03556	JS609_00345
Alpha-galactosidase	QDK91116.1	JS608_03384	JTE87_00899	JS609_03025
Alpha-galacturonidase	ASB68722.1	None	None	JS609_00767
Aryl-phospho-beta-D-glucosidase BglA	QDK90194.1	JS608_02396	JTE87_01892	JS609_04055
Aryl-phospho-beta-D-glucosidase BglC	ARV97270.1	None	None	JS609_00386
Aryl-phospho-beta-D-glucosidase BglH	QAS10023.1	None	None	JS609_03976
Beta-glucanase	AYL88759.1	JS608_00217	JTE87_00014	JS609_03959
Beta-glucanase	AYL88759.1	JS608_00217	JTE87_04069	None
Beta-hexosaminidase	QDK88534.1	JS608_00614	JTE87_03671	JS609_00211
Beta-mannanase		JS608_00188	None	JS609_00618
		None	None	None
Cephalosporin-C deacetylase	QDK88655.1	JS608_00742	JTE87_03542	JS609_00359
Cortical fragment-lytic enzyme	ATC51419.1	JS608_00424	JTE87_03863	JS609_00022
Demethyllactenocin mycarosyltransferase	QDK88875.1	JS608_00988	JTE87_03296	JS609_00617
Endo-1,4-beta-xylanase A	QDK91715.1	JS608_04031	JTE87_00249	JS609_01995
Endoglucanase	QDK90074.1	JS608_02270	None	JS609_01916
Endoglucanase	CCF05300.1	None	None	None
General stress protein A	QDK91887.1	JS608_00162	JTE87_00069	JS609_03892
GlcNAc-binding protein A	QEQ03549.1	JS608_02218	JTE87_02071	None
Glycogen phosphorylase	AIX08721.1	None	None	JS609_03089
Glycogen synthase	QAW13524.1	None	None	JS609_03090
Intracellular maltogenic amylase	AMR45682.1	None	None	JS609_03485
L-Ala--D-Glu endopeptidase	QGT57119.1	JS608_03605	JTE87_00677	JS609_03258
Maltose-6'-phosphate glucosidase	QDK89133.1	JS608_01270	JTE87_03016	JS609_00864
Melibiose/raffinose/stachyose import permease protein MelC	QEK97784.1	JS608_03383	JTE87_00900	JS609_03024
Membrane-bound lytic murein transglycosylase F	QDK89432.1	JS608_01601	JTE87_02684	JS609_01215
Membrane-bound lytic murein transglycosylase F	QDK90428.1	JS608_02724	None	None
N-acetyl-alpha-D-glucosaminyl L-malate deacetylase 1	QEQ03843.1	JS608_03770	JTE87_00512	JS609_02193
N-acetylglucosamine-6-phosphate deacetylase	ASB54801.1	JS608_03873	JTE87_01560	JS609_03525
N-acetylglucosamine-6-phosphate deacetylase	ASB54800.1	None	None	None
N-acetylglucosaminyldiphosphoundecaprenol N-acetyl-beta-D-mannosaminyltransferase	QDK91629.1	JS608_03942	JTE87_00338	JS609_03617
Oleandomycin glycosyltransferase	QDK89494.1	JS608_01668	JTE87_01911	JS609_01294
Oleandomycin glycosyltransferase	QDK90176.1	JS608_02376	JTE87_02617	JS609_02068
Oligo-1,6-glucosidase	AKD24292.1	JS608_03494	JTE87_00789	JS609_03151
Oligo-1,6-glucosidase 1	QAW18252.1	None	None	JS609_03479
3-phytase		JS608_02425	JTE87_01863	JS609_02112
Pectate lyase	QDK89071.1	JS608_01201	JTE87_03083	JS609_00804
Pectate lyase C	AIC99792.1	None	None	JS609_03519
Pectin lyase	QDK91950.1	JS608_00231	JTE87_04055	JS609_01975
Penicillin-binding protein 1A/1B	QDK90466.1	JS608_02709	None	JS609_02178
Penicillin-binding protein 1A/1B	QDK90466.1	JS608_02709	None	None
Penicillin-binding protein 1F	QDK89310.1	JS608_01475	JTE87_02812	JS609_01067
Penicillin-binding protein 2D	QDK91796.1	JS608_00067	JTE87_00164	JS609_03799
Penicillin-binding protein 4	QDK91217.1	JS608_03518	None	JS609_03174
Peptidoglycan-N-acetylglucosamine deacetylase	QDK89265.1	JS608_01429	JTE87_01216	JS609_01025
Peptidoglycan-N-acetylglucosamine deacetylase	QDK90813.1	JS608_03066	JTE87_02858	None
Peptidoglycan-N-acetylmuramic acid deacetylase PdaA	QEQ05952.1	JS608_01255	JTE87_03031	JS609_00844
Peptidoglycan-N-acetylmuramic acid deacetylase PdaC	AIX06967.1	None	None	JS609_01282
Processive diacylglycerol beta-glucosyltransferase	QAV83859.1	None	None	JS609_01417
Processive diacylglycerol beta-glucosyltransferase	QDK90264.1	JS608_02475	JTE87_01812	JS609_02138
Pullulanase	AYA43052.1	None		JS609_02990
putative 6-phospho-beta-glucosidase	QDK91899.1	JS608_00173	JTE87_00058	JS609_03909
putative esterase YxiM	AOY05484.1	None	None	JS609_03964
putative oligo-1,6-glucosidase 2	AHC40869.1	None	None	JS609_00325
putative protein YqbO	QDK89544.1	None	None	JS609_01344
putative rhamnogalacturonan acetylesterase YesY	ASZ60459.1	None	None	JS609_00761
Putative sporulation-specific glycosylase YdhD	CAB12390.2	None	None	JS609_00616
Putative sporulation-specific glycosylase YdhD	QDK89600.1	JS608_01783	JTE87_02504	JS609_03425
Rhamnogalacturonan acetylesterase RhgT	QFY87628.1	None	None	JS609_00756
Rhamnogalacturonan endolyase YesW	QAT44941.1	None	None	JS609_00759
Rhamnogalacturonan exolyase YesX	AIX06475.1	None	None	JS609_00760
Trehalose-6-phosphate hydrolase	AVX18210.1	JS608_01233	JTE87_03053	JS609_00827
UDP-N-acetylglucosamine--N-acetylmuramyl-(pentapeptide)pyrophosphoryl-undecaprenol N-acetylglucosamine transferase	QDK89788.1	JS608_00110, JS608_01977	JTE87_00121, JTE87_02314	JS609_01610, JS609_03834

## Sheet: Table S7
Table S7. Putative genes encoding antioxidant in the genomes of three Bacillus strains
Description	Gene id	B. amyloliquefaciens PTA-84	B. amyloliquefaciens PTA-85	B. subtilis PTA-86
Superoxide dismutase [Mn]	sodA	JS608_02998	JTE87_01284	JS609_02456
Superoxide dismutase-like protein	yojM	JS608_02374	JTE87_01913	JS609_02066
Thiol peroxidase	tpx	JS608_03312	JTE87_00971	JS609_02946
Thiol-disulfide oxidoreductase	resA_1	JS608_02246	JTE87_01493	JS609_01902
		JS608_02790	JTE87_02043	JS609_02262
Thiol-disulfide oxidoreductase YkuV	ykuV	JS608_01870	JTE87_02417	JS609_01508
Thioredoxin	trxA_1	JS608_02520	JTE87_01059	JS609_02844
	trxA_2	JS608_03225	JTE87_01767	NA
Thioredoxin reductase	trxB	JS608_03853	JTE87_00428	JS609_03503
Thioredoxin-like protein YdbP	ydbP	JS608_00883	JTE87_03401	JS609_00507
Thioredoxin-like protein YtpP	ytpP	JS608_03357	JTE87_00926	JS609_02981
Catalase	katA_1	JS608_00191	JTE87_00040	JS609_03916
Catalase HPII	katE	JS608_00215	JTE87_00016	JS609_03957
	katE_2	NA	JTE87_04071	NA
Putative deferrochelatase/peroxidase EfeN	efeN	JS608_00150	JTE87_00081	JS609_03875
Sporulation thiol-disulfide oxidoreductase A	stoA	JS608_01832	JTE87_02455	JS609_01470
Glutathione hydrolase proenzyme	ggt	NA	NA	NA
	ggt_2	JS608_02314	NA	JS609_01947
Glutathione hydrolase-like YwrD proenzyme	ywrD	JS608_03981	JTE87_00299	JS609_03652
Glutathione transport system permease protein GsiC	gsiC	NA	NA	JS609_01195
Glutathione transport system permease protein GsiD	gsiD	JS608_01344	JTE87_02945	NA
Glutathione-independent formaldehyde dehydrogenase	fdhA	JS608_00753	JTE87_03531	JS609_04068
Glutathione-regulated potassium-efflux system protein KefB	kefB	JS608_01608	JTE87_02677	JS609_01222
Putative peroxiredoxin bcp	bcp	JS608_01314	JTE87_02974	JS609_00912
Bacillithiol biosynthesis gene	BshA	JS608_02670	JTE87_01529	JS609_02141
	BshB	JS608_02671	JTE87_01528	JS609_02142
		JS608_02672	JTE87_00504	JS609_02023
Free methionine-R-sulfoxide reductase	msrC	JS608_03327	JTE87_00956	JS609_02961
Peptide methionine sulfoxide reductase MsrA	msrA	JS608_02454	JTE87_01833	JS609_02115
Peptide methionine sulfoxide reductase MsrB	msrB	JS608_02453	JTE87_01834	JS609_02114

## Sheet: Table S8
Table S8. Putative antimicrobial resistance genes identified through genome analysis
Bacillus strain	Gene product	Gene id	%Coverage	%Identity	Accession number	Antibiotic Resistance
B. amyloliquefaciens PTA-84	23S rRNA (adenine(2503)-C(8))-methyltransferase ClbA	clbA	100	96.86	NG_062350.1	Lincosamide;Macrolide;Streptogramin
	tetracycline efflux MFS transporter Tet(L)	tet(L)	100	86.64	NG_048204.1	Tetracycline
	streptothricin N-acetyltransferase SatA	satA_Bs	100	85.63	NG_064662.1	Streptothricin
	rifamycin-inactivating phosphotransferase RphC	rphC	99.31	80.41	NG_063825.1	Rifamycin
	cfr(B)	cfr(B)_3	98.67	87.74	KR610408	Chloramphenicol; Florfenicol; Clindamycin; Lincomycin; Linezolid; Dalfopristin; Pristinamycin_Iia; Virginiamycin_M; Tiamulin
B. amyloliquefaciens PTA-85	streptothricin N-acetyltransferase SatA	satA_Bs	100	85.63	NG_064662.1	Streptothricin
	tetracycline efflux MFS transporter Tet(L)	tet(L)	100	86.64	NG_048204.1	Tetracycline
	23S rRNA (adenine(2503)-C(8))-methyltransferase ClbA	clbA	100	96.86	NG_062350.1	Lincosamide;Macrolide;Streptogramin
	rifamycin-inactivating phosphotransferase RphC	rphC	99.31	80.41	NG_063825.1	Rifamycin
	cfr(B)	cfr(B)_3	98.67	87.74	KR610408	Chloramphenicol; Florfenicol; Clindamycin; Lincomycin; Linezolid; Dalfopristin; Pristinamycin_Iia; Virginiamycin_M; Tiamulin
B. subtilis PTA-86	macrolide 2'-phosphotransferase MphK	mphK	100	97.72	NG_065846.1	Macrolide
	ABC-F type ribosomal protection protein VmlR	vmlR	100	98.66	NG_063831.1	Lincosamide;Streptogramin;Tiamulin
	streptothricin N-acetyltransferase SatA	satA_Bs	100	95.78	NG_064662.1	Streptothricin
	tetracycline efflux MFS transporter Tet(L)	tet(L)	100	100	NG_048204.1	Tetracycline
	aminoglycoside 6-adenylyltransferase AadK	aadK	99.77	98.12	NG_047379.1	Streptomycin
	rifamycin-inactivating phosphotransferase RphC	rphC	99.39	82.18	NG_063825.1	Rifamycin

## Sheet: Table S9
Table S9. Animal diets
Diet Formulation
Ingredients (%)	Starter (days 0 to 12)	Grower (days 12 to 26)	Finisher (days 26 to 42)
Soybean Meal Dehulled, Solvent	33.3	28.17	26.12
Corn, Yellow, Grain	31.56	32.25	33.27
Wheat, Soft, Grain	30	34	34
Deflour. Phosphate	2.08	1.92	1.68
Fat, Vegetable	1.74	2.35	3.68
Calcium Carbonate	0.33	0.33	0.34
DL – Methionine	0.29	0.26	0.22
Vitamin/Trace Mineral premix	0.25	0.25	0.25
Salt, Plain (NaCl)	0.17	0.19	0.19
L – Lysine HCL	0.17	0.17	0.11
Trace Mineral	0.08	0.08	0.08
L-Threonine 98.5	0.04	0.04	0.03
Total	100	100	100
Calculated Nutrient Composition
Nutrients	Starter	Grower	Finisher
Metabolizable Energy (kcal/kg)	3008	3086	3167
Dry Matter (%)	87.59	87.55	87.61
Protein, Crude (%)	22	20	19
Fat, Crude (%)	3.67	4.31	5.33
Fiber, Crude (%)	2.44	2.41	2.37
Calcium (%)	0.9	0.84	0.76
Phosphorus, Total (%)	0.76	0.71	0.66
Phosphorus, Available (%)	0.45	0.42	0.38
Total Methionine (%)	0.61	0.55	0.5
Total Lysine (%)	1.3	1.16	1.06
Digestible Methionine (%)	0.59	0.53	0.48
Digestible Lysine (%)	1.18	1.05	0.95
Digestible Methionine + Cysteine (%)	0.88	0.8	0.74
Sodium (%)	0.2	0.2	0.19
